# Supplementary material for: Multi-objective optimization for RNA design with multiple target secondary structures
Source: BMC Bioinformatics. 2015 Sep 3;16:280. doi: 10.1186/s12859-015-0706-x (PMC4559319; doi:10.1186/s12859-015-0706-x)
Supplement: Additional file 1 — Supplementary Tables S1 – S9. The detailed results of the RNA sequences designed by MODENA. The results for two-, three-, four-target designs with and without sequence constraints are included. (XLSX 71.7 kb) [file 12859_2015_706_MOESM1_ESM.xlsx]

## Sheet: Description
	Additional file 1
	"Multi-objective optimization for RNA design with multiple target secondary structures"
	Akito Taneda
	Descriptions of the columns
		descritption
	target	The name of the set of target structures.
	de1	The energy difference in kcal/mol between the ground state and the lowest energy target structure of the selected sequence.
	de2	The energy difference in kcal/mol between the ground state and the highest energy target structure of the selected sequence.
	Nsq	A GA population size.
	GC	The GC content of the selected sequence.
	n1	The number of the designed sequences such that one of the two target structures has the lowest free energy.
	n2	The number of the designed sequences in which both target structures have the lowest free energy.
	selected sequence	The representative designed RNA sequence which has the lowest de2 in the Nsq designed sequences, where the RNA sequence with the lowest de1 was selected if multiple RNA sequences have the lowest value of de2. If multiple designed sequences satisfy these conditions, the one with the GC content closest to 50 % was selected.
	List of tables
		description
	Additional file 1:Table S1	The detailed results of two-target designs (SV11&RNAtabupath dataset).
	Additional file 1:Table S2	The detailed results of three-target designs (RNAdesign dataset [3str]).
	Additional file 1:Table S3	The detailed results of four-target designs (RNAdesign dataset [4str]).
	Additional file 1:Table S4	The detailed results of two-target pseudknot designs (PK60 dataset).
	Additional file 1:Table S5	The detailed results of two target designs (PK80 dataset).
	Additional file 1:Table S6	The detailed results of two target designs (LE80 dataset).
	Additional file 1:Table S7	The detailed results of two-target designs with sequence constraints (RNAtabupath dataset).
	Additional file 1:Table S8	The detailed results of three-target designs with sequence constraints (RNAdesign dataset [3str]).
	Additional file 1:Table S9	The detailed results of four-target designs with sequence constraints (RNAdesign dataset [4str]).

## Sheet: Table S1
Additional file 1:Table S1 The detailed results of two-target designs (SV11&RNAtabupath dataset).
target	de1	de2	Nsq	GC	n1/n2	selected sequence
SV11	0	0	100	49.5652	100/19	CGCCGUGCGUGUAUCAUGUACUUGUGAUUGCACAUUUGUGCAAUCACUAAAUUGAGGCGAUACAGUGAUUGCGUAGACGAGCAAUCACGGGUGUAUGGUCAACAUGCGCCAGCGC
alpha operon	0.1	0.6	100	50	0/0	UACGCUACAUCUAGGACUAUCAUCCAUCUGCUGAUGUCGGAUAGAUCCUGGUGUAGCUCUCUCCACCCGGAUAGCAAGCUGAAGCACCUAAGGAGCUCAGCCGCUAUCCGUAAACUCCUCCUCAUUCAUU
amv	0.6	0.7	100	50.3448	0/0	AUAUGGCUUCCCAUCUAAGAUGGCACCGAAGCAGUAAGUUGAGCGGUGCGCCGUGAGUACCGCAAGUUCAACUUACCAGAUUCAGACCAGUGAACUGGUCUGAAUCAUCCGCUAUAGGGAACUAUAGCAAAGGCUACGGCCAAGG
attenuator	0	0.8	100	50.6849	33/0	CAACGAGGAGCUAGCGCGUGAGAUAAAGAACGGAUAACAGCGCUCGAGUGUGAAGCGCGCUUCACACUUAUAA
dsrA	0	0	100	50.5882	100/7	CAGCUGGUCACGCCGACCAGCCACAAUCUAAUUAUUCGUCGCCGGAGUGAUCUGGAUUCGCUCAGUAUCUUAUUGAUGCUGAGCU
HDV	0	0	100	50.3268	100/30	GGAACUCAGGUGCCGAGCUCCUAAUGGCCCUAGUUCCUCCCACUCCUAAUCUCGCUUCUAUAGUCAUGUAUCUUUAGCGAUACUUGACAUAGACGCCGAGCAUUGUUUCUGCAUGAAACGAUCGCUCCCGAGCUGGGCCAACUCUCUACAUUC
HIV-1 leader	0.5	0.7	100	50	0/0	GCUCCGACUUUAUCAUGUUCUCAAUCGCAGAACAGCGAAGAACUGAUACUGCGCUGCCGCUCGAAUGGCAUUAAUCACCGGAAUGUUUGUCUGCUCCGAUGACAACGCCCUGAGUGAAAGGCAGGUGCACACUCACUGGAAGCAGGAAGUACUCGAUGUAAAGUAAGCUCCUCUUAUCUCUACACUCCACUAAGGACGAAUAACGACGAGUACACGUGCACUACCCAAUGGUUCGUUUCUCAAAGGCCAUCGAGCAGGCUAAGGUUCCAUGCCUCGUGCA
ms2	0.4	0.4	100	50.6849	44/0	GACUGCACACUCGCAAGAGUGUGUGGUCAAAUACUCGCGGGUAGGGCACUAGAUUAUCUGUUCCUCUAAACGC
rb1	0	0.04	100	48.6486	75/0	AAAUUGCCUCAGCAGGCCACUUCACGGCCUCCACUCUUUAGCCCGCCUCACUUGCGGGCCCGGCGAUUUACCCUCUGUGUGCAAUAUGAAGCACAAACUACACUCACUAAGAGGGUAGAUUACUUACCAAUUUACUUUCUUACCUUUC
rb2	0	0	100	49.5575	100/89	GCCUAUACUAACGCCCUCACUACCACCGAGGGCUACCACCAGAACUCAAUCCGCGAGUUCAGAGUGUAGGCACUUCAAAUUAUCCCAACCUCUAAUUUCAAUGCCACACUCCU
rb3	0.1	0.1	100	49.6454	52/0	CAUAACUUUCAAGCGACCAUGACGCCAAGUCUAUACAGUCCGCCUCGGCCUCUACGGAGAGCCUGGCAACCACUUUCGGCAAGCCCGCCGACCCAAGUUAUGCUUUCCCUAAAUAAGUUGGGCACAAAUUUAUUAAUAUGC
rb4	2.1	5.6	100	50	0/0	AUUUGCUGCCUCGAGUCUUAGUGACCGAAUAAAUGAUCAGCUCUCCGGCCACACGCUUACCUGCGUCCCGCCAUAAAUGACUGCGUAGACAGCCAGAGUUUGACCAAGAAGGUAUGAGUUCUACCCAUUAACACGCUGUCACGUAG
rb5	0.46	0.5	100	49.7512	0/0	AAAUCCUCCCAAUCCCAAUAUGCCCACGCACCUGCACAAACCAGGUUCACAUCACAGAUGCGGCCCUUACGCAUCAAGGCGUAUUCACAACCUGGCGCACGACACAGCGCCUUCCUAUCUCCUAUGGUUGUGAGUACAACACAAGUAUUCAUAAUUAUCAUCUCACCUUUACCAUCCAAACCCAAACCCACCCACCAACCC
ribD leader	0.8	1.2	100	51.9737	0/0	GACACAUCAAGACACCAUAUAGGCGCAAAUCGAUCGGCCAACCCAACGCGGGCGGGAGGACAGAGAGGGCGACUGUCCUCUAAGUCACAAUAUCUCUGACGACAGUCAGAGAGGACUGCGACACACGUCGUACUCACCAAACAAAGGUUCCACCCGCUGUCCACACUAUUAGGCUCAGACUACAAUAUCACCUGUCUGAGCCAUAGUUGGAGGGCCUAAUUAUCAGCGGCUUUACGAUGCCAAGUCGGCAUCGUAAAGCCUAUAUCCUGAACACUGCCUUAGCUCCGGUUUACGCCCAAUUUCC
s-box leader	0.7	0.8	100	50.2024	0/0	CUAUAAACUCUCUCCCACAUCACACAUCGCAUGGAGACAUACUCUUGAGGUACCCGAGGGAAUGGCCCUUUGAUGGUACCAGGAAGCGCGCAUAGACCCAUCAAUUGAUGGACCCGGACUUCGAAACGGGUGUCGGUUUACCGACUACAGCAUCGCUCCUUGCAACUGCAUUCCACGAAUGCCCGAGUAUGUCUCACCAUGCUCUACUCGCAGAUACUGACAAUAUGAUUAUUGUCGGUAUCUGCCA
s15	0.1	0.4	100	50	0/0	AGCGACUGUGAGCACUCAAUCGUUCACGUUGGAGCAGAAAGACCAUCUAGCCGAAAGAAGAAAGGCUGGUGGAA
SL	0	0	100	50	100/28	UUCCUCGCAGCUAUAUCAUAAUCGCGCCGUGACUAUGACUUGGUCUGAUGGUGCUC
thiM leader	0.6	1	100	50.303	0/0	UAGAACAAACCAGUCUGUGAUAACAUGGGCUCUUCCGCAAGUUUACAUGCUCACCCAUGGGUCAGCUCAAGGCGAUCACAGGGCGGUUAUUCUAGACCUCUAGCUUACCGUUGAGUGAUAUCGCCCAUGCCCUCAGAGCCACUGGCGAACAUCCAAGGAUGAAAU
mean	0.38	0.755294	-	-	-	-
median	0.1	0.5	-	-	-	-

## Sheet: Table S2
Additional file 1:Table S2 The detailed results of three-target designs (RNAdesign dataset [3str]).
target	de1	de2	Nsq	GC	n1/n2	selected sequence
sq1	0	0	100	50	100/21	UUCCAUCCCAGCAUAUAAGUCACCCUUACUCACUCGCACAUGAGUGUUCAGGAUGAUCUGCUCGUUCAGAGCUGAUGAUCGGAACACGGUGCAGUGAGCA
sq2	2.1	2.8	100	50	2/0	UCCCUGCGGUAUGUUUACCGAAGCUACAUACGUGCUAAACAUCAAUAGCCUUCGAGGUAAAGCAGCUCAGCUGGAUCUAGCCUUGCUCACACGCUAGUCG
sq3	0.1	0.2	100	50	18/0	AAGUGCCUUUGACUUCGCUCUCCUGCGAUCCCAUUCGAGAUAAUGGUACUCUCCUCGGAACAUGUCCACUCUCUCUUAGGAACUCCAACUACUGCACACG
sq4	0	0.1	100	50	75/0	AUAACUGGGCCUAGGGAAAGCGCUUGUGGACAACGUCUUCAGAACAUAGCUGAAGAACACCACAUCCGACCCGCAAACCUGUUAGUGUGCCAUUACCAAG
sq5	0	0	100	50	99/14	AACUCUGUUAACCCUAGACGGUUAAAGGAACGGACGUGUCGCUUCGAUGAAGCCCACGUACCGCCCUUUAACCAGGAAUCUUGUGAUUCCAAUUCCUGCC
sq6	0.1	0.8	100	46	21/0	AAACGAAACUAUGCCUACCAACUGGGAUAAAUACACUUUCGGACACUUAGGGCAACACCCAAAGACGGUCAACAUGAACAGUCACAAUUAUCCACCGGGC
sq7	0.2	0.3	100	54	42/0	AUUUCAUAGCGUCCCACCGACGGUACGCACGAGCGCAUCAGGAUUUAACCACCCAUCCGCAACUAUUCUAGAUCGAAUACCGGAACCGGCGCGCUAACAC
sq8	0	0	100	49	97/3	AACAUUUCUUAUGACCUACCUAAACACGACCGGUGCCGAGUGCUCGUGCGAGCCUCAAUGCAGCGGUAUUUGACCAGCAUGGUCAUAUGUAGAGUAUUCC
sq9	0	0.02	100	50	99/0	ACCCUCCACGAAUCUACGCAUCGCCUCUGAGUCACAUAUCCUGUCGUGUAAGACUGAUAUGAUGUCUCCCGGCUUAGGCGAGAUUCUUAACCUUACGAGG
sq10	0	0.2	100	50	22/0	AACCUCCGACUCGUCUGUCAGCAAAUGGCCCACAUAGGCGACAACUCAGGUCACCUAUGUAAGCCCUUUGAGCACAGUAAACCCUAUGAUACUACGCGUU
sq11	0	0.1	100	50	64/0	AACAAGUUUAUUAUUAACGCCAAGGACCAGCUGGCCCGAGUUGGCUUAUUAGCUGCUAACGUCGUUCCUGCUGCCCUAUCCCAUCGUUGGUCUGACAACG
sq12	0	0.1	100	50	60/0	AGCGGCAAGUAAGAGCGACGCUCCGUCAGCUGACACUUGCCCUGUAUUCCUCUGAGUAUCGCUUCCCAUAAUACUCCUAGAUACUCUCGAAUACGGCAUU
sq13	0.7	1.1	100	53	8/0	ACUCCCGGCGCAAAUAAUAAGCCUGGGUCACGAAUGAUUAAACUCAUGUGCACCUUCCUUGAGAUUCGUGUACCAGGCAGGCGCCUGGCAGGGAACUAGG
sq14	1.2	1.7	100	54	4/0	CGACACCGUUGGACCAUGCACGGAGUCAAGACCCACAGGCCAUCAUCUGUUGCCAGAGCAGGGCAAUAACCGGUUCUUUGAUCCGAACACAAAGGAAACG
sq15	1.6	2.1	100	50	0/0	CACGCCCACAGUCAGCAUUGAUUUCAGCUCUGAAACUCGUCCCUAGCCAACAAAUAUCGUGUGGAGCCAUCUUAUCCUCGCUGCAUCAGUGAUGGCCUAA
sq16	0	0.1	100	50	62/0	CAUUUAUCCAACCCAUGCCAUACCGUCCUUCAACCCUAUAGGGAUCCGUAAACGGGAUGCUUAACACCAGCCGGCAGAUAUAUUUCAGCCAAGAAGGGCC
sq17	0.4	1	100	53	18/0	UAAUAAGGCUCCCACAUUCCCUGAACACUCCACGAAUCACACGAAUGAGCUUCACCAGAUGGGACACCGAACCGGGCGAGAAGAGCCCGGAUCCCUAUUA
sq18	0	0.82	100	52	24/0	AGACCUCGCGGACCGCGCCACCAAGUAUUAGACCUGCUGCCACCCUCUUACAUCGAAAUCGUUUAUGUCCAGCUAGCUAUAACCUCCACAUGAUUGGAGG
sq19	0.1	0.7	100	53	0/0	AGCUCUUGGCAUCCCGCUUUACUGUAGCGCUGUCAGAACGACAGCCAAUGCUGCCACCUUCAUGAGUCCACGCGAGGAGUCAUAGAGCAAUGUCCAUCUA
sq20	0	0.1	100	50	47/0	GGUCCAGCUUUCGGUCAUGACCAAGUCGAUCGACUUGGUCUACGCAAAUCGCAGACCUUCUAGGCAUAUGUACGAGAAGGUACAAUGAAGACCUAGCGUC
sq21	0.7	1.4	100	48	3/0	GUCGCUCGUCUAAACUCAAACUGCAUAAGCUCUUUAACUUAGUACCAGCUACAGACUCGUCAGCUGAGACCCUAUUAAGCUGUGCCAGGGACCGUAUCCU
sq22	0.2	0.4	100	50	1/0	AUAGUCUUAUGUCAAAGACAAACGUCUACAUAGCCCUACGAAGCACCACAGAGCCAUGGCAAGCCGGCCUGUACCGCACGUAUCAAUUGCUAUCCACACC
sq23	1.9	2.4	100	50	0/0	UAAGAAGGGUACACCAUCUCCGGCCCUGGACAGCCGGAACCCUCUUCAGCCAUGACUCAUUCAGUCAGUAUAAUAGACUCAGAUUUGAAGAAGCCACCAG
sq24	0.1	0.4	100	50	15/0	AGCCACCGAUUUGGUAAUCAGAACCUUCCGAGGUGAUCACCGAAGGACUUACCAGCCAAGUCGUCGCCUGAAGACUUUCCCACUUAUUACAAUCGACCUC
sq25	0	0	100	50	100/100	UAGCGAAAUAAAUUCAACAGGCACUAGUCAGGACCCUACCCGGACAGCUUCCUACGGGCUGCUGCACCGUUUAGUAUCAGGACUAGGCCACCAAUACUAA
sq26	0.3	0.4	100	50	23/0	UUAAGCUACCCAACCACUGUUCAGUAUGUCUCAUGUAGGUCGUGCUCCGUCGAGACACCUUCUAUGAAGGAUCGACUAAGAGCACAACCGCCAUGAUGCC
sq27	0.5	0.8	100	50	0/0	UAAUCUCCUCCUAGUGCACGCGUCUCCCAGUCCCUGAAUACGGGACACAUUCAAGAAUUAAUAUAGAAUUCUCUCUAGCCCGGGUUCCGGACUAGCGUGC
sq28	0.6	0.6	100	57	26/0	CUUUAAAGCCAUAGAUCCGAGACUCCGCACCGAGCGGGAUACCGCAGUCAGGGUCAAUUCCGGGCCUGGUCUCAACUAUCACCCGAUCUCGCCCACUUUC
sq29	0.1	0.3	100	50	50/0	GACGACCAACCACAACGUCGGUUCCAGACUCGAGGGACCACGAUUGCGCUCAUCGUUGUGAUCAGGUAUUAUCAAACGUGUUGAGCUACACACCAGAUAU
sq30	0	0	100	53	67/1	AAUCUCACGACCCAGGCAGGAUCAUUUCGAUCGCCCGGACCAAUCUAAGGAGUCCACGGACUCACGCGAUCCGCAACUCGUUAGAACCCUACACAACUAA
sq31	0	0.23	100	50	28/0	UCCACGCCCAAGGUCCAAGGAAACUCACUUACCAAUCACCAAAGGAUCCUGGACACCGACACACCUUGUGGCGAACUAAGACUAAUUGGACGUGCCAAUU
sq32	0	1	100	47	7/0	UACUCUAGAAUCACCCUUUAAGUAAACCCGGAGCACCUACGCUCCCUAUCAUUCGUCGUGCUCCACCACAGCAGAGGAAUAUCAAUAUCAUUCCAAGUGG
sq33	0	0	100	50	100/48	ACGCGAGUAUAGUGCAUCGCACAGGAAGGAGCCUUCAGCGUGGGAUGCUCUAUACUACGCUAAUCCUUACUAACAUCUCUUAGCUCCGCUUCGGCGAUUA
sq34	2.71	4.65	100	52	0/0	UUUAUUAAGUCCACUCGCCUGGAACCGACCGCGUUCCCGAGAGUACGCGAAACGACAGGUCCACGCCCUAUUCUCUUGAGGAGAAACCGUAUAUCACCAU
sq35	0.3	0.39	100	47	0/0	AACACGACAUGUUACAGACAACCAUCCAUCUGACACAUGUCAAUCCGACGAACCCUCCUUAAUUCGGUAUAAUUGGCCGAUAGGCACCAGAUGGAGGCAA
sq36	0	0	100	50	77/21	AAAGUACAGCUAUAGCUCGUGCUCCCUCGCAUAGGCGAGUACACAAGGACGCACGAGCAGAAACCUUAAGCUUGGCUUCGGCCUUAAGAAACAAUCCCAA
sq37	0	0	100	50	91/18	CUUUGUGACACGAACACUUACGUUCACCCGACUACACGCUCCUUGAAAUGACUUACACUUCUGAGACCUCGGUGCCUUGCACAAAGAACUGCACCGAUGC
sq38	0	0.04	100	50	100/0	UCUAGAGCCUUCUCUACACUCUUCUAGAACACCUAGAAGAGGGCAAGCUAACGCCGCCAAAUCUUAUCCACCGCAACAGCCCAACCUUCGUAGAGAUAGC
sq39	0.2	1.1	100	52	0/0	AUCAUCGACGCUCUGAUGGACUGACUAGUGUCGAACGUGGCGUUUCUCCCUCUGAACCUUAACUCUCGAAUAAUCGUCCAUCCCGACGCCUCUCAGAACC
sq40	0	0.1	100	50	65/0	GCUCAUUUGGGUUGCCUUCACCGUGACGGCCAAGCGUCCGCUAAUCAGGCCCUUCAACCUGAAUGAUCUUACACAAAUACUACAAACACAGGGUAGAUGC
sq41	0	0.1	100	50	90/0	CCGGAUUAUAAACCCUGUUGAGUAUUUAUCGCAGGCGUCACGAGCGCACGAUCUAAUAAGUGGCCGUGACCCAGCAUGAUGCCUAAUCAUGCAAUCGCGA
sq42	0.64	0.84	100	49	33/0	UAACGCACUUUGCCCGUUUAAUGCAUACGGCAUCUGAUCCAAGACACGCUUCCUGCGGUCAAUAGCCUUAUAACCAAGGCCAAACAGCGCCACUAAUCCA
sq43	0	0	100	50	100/44	AUCAUAACAGGCCGACAGGAACCAUGCAACACACAACGCAUGCCAGCCUGGGCCAUUUAACCCACGGAACUUAGGGUAUCACGAAUGGGUCCAUUAGUAA
sq44	0	0.1	100	49	53/0	CCGCUGCAAUAUAAACCGCGGCAUGGAUCGAUUAUCGCACCAGUAAACUCCACUACCGAAAUCGGUUGACUUCGAAGACCGAUUCUCACAACAAGAACCG
sq45	0	0	100	51	82/2	AGAGCGGAACGGGCACAAUCAUCAAGCUACGUCGCAGGAUGUCACAAGGCCGGUUCCGCACAAAGUCCCACACUACGCCAAAUAAUCUGAGUAACCUAAU
sq46	0.3	0.31	100	50	14/0	GUAUUAGUCACCACCACCCACCUGCAACAUCAUAGAAGGGAACUGCGCCGGUCGUUCCGGCGCGAUAUACCUUAAUUUACGCCAACGUAUAUACUGACCU
sq47	0.3	0.9	100	50	0/0	AGCCGUACUCCAGCACAUCUCCGUGCAUUCCGAUCUAGGCAACUUUAAGCUCUAGAUCUCUUCAAGCGUGCUAGGGUCAUAGGACAAUAGCAGCCACCAA
sq48	0	0	100	50	100/41	AGCCUCGAUUCGGAAGGUAAACCGACUAGCCAACAGGCAUCCAACAUCGGAGCUUUGUAUGGUCAAAUAGAAAGCACCUCCGACAUACACUUCGUUCGCG
sq49	0	0.1	100	50	88/0	CUCAAGCACGCAUCUCGCGAAGAGAUGAAAGCAUGAAUCGAAGCUCGUCUAGCUCAUCCCACCUACACUGCUAGUCGAGCAUUCCAUUCUAGGACCAGAA
sq50	0.8	1.05	100	50	47/0	CGCUCAUCUGAGCUUCAAUAAGGUUAACAAACCCGUAGUGUGCCACGGCCAUCUACACCCAACGUAGUUCAGCCCAUAACACUAUCGAUCCACAACUCCG
sq51	1.45	1.82	100	50	0/0	UGUCCCACAUAUAGCACUCCGUCGUAUCUAACUCAAGAACAACGAUCGGUACCUUAUGCGACGUUAUACCGGACCUAUAGUCUCCGAACCACCCGGCCAA
sq52	0.2	0.7	100	50	8/0	CGUCCGACAGUAUUAUGGUCCGUCGCCUAUUACUGCGCGUGACUCGUUACAUGUUAGGACCAGUCCUUCCAACGAGACACACUUCUCAUACGGAAGAAGA
sq53	0	0	100	50	100/7	GCUAGCCGCGUGACACACUCCCUAGCUAGAUGCUAGGCAACUAUCCGAGAUAAACACCGGCAGCUCCCUAGUUGCAAAUCUACACGCAAUUAGAUAGCAU
sq54	0.31	0.6	100	53	18/0	AGAUAAAGCCGGAUCGCGUUUCUCGGUCCAUGCCGACAUUCAUCCUUAUCUCAACCAAGACAGCUAACUAACAGGAUAGGGACCGUCGCCCGGCAAAGCC
sq55	0.2	0.2	100	53	26/0	CGGUGUAUGCCGAAUCAAUCUGGACGCUUCACCUAAUGGGUCCCUUAUGGAACCAAGGCGGAAGCCCAAACCAGAUUGCAGUCCCUCCUAAGCAUACUCC
sq56	1	1.2	100	55	0/0	GAACACGGAGACCCUUGAUACGAGACAAGCACUUCAUGCAAGCCGAGAAGGCUGCAAGCAGUAUCUCUCGACCCUGCAUGCGAAGAGGGUACGUGAGACC
sq57	0	0.1	100	52	84/0	CCCGGACAACGUAUAUAAAGAGCGCACAUGCGACUCAAGGUAUGACACCAGAAGCUACGCGGAGCAAGGCACCAGUAGCACAGCUGGAACAUACCAACAA
sq58	0	0.1	100	52	65/0	AUCAAUCGCAAUAAGUCGUACUGACCCUCCACUACCGUAAGGAGUGUCAAUGAGGCUAGUCAGACGAGCGUACGAGAGACUUAGGCCUCUACGGAGAGCG
sq59	0.3	0.6	100	50	54/0	CCACAGCGAAAGUAAUCCUGGUCAGAAACAGACCCGAUUACAAACGCCCAAACUAAACGUCUCGUAGAGAAACUCGAAUGCGCCAGCUCCUCGAUGCUCA
sq60	0.36	1.24	100	51	0/0	AACUCCCUAGUACAACAGACGCGUACUCACAGUUCCCAGCGAAGCCUUUCAAUCCCGGUGAAGAGCCGAAUAGAACGCCCGUCUCUUCAAUCUAAACUCC
sq61	0	0.5	100	50	27/0	AAACACAUAUCUUUAUAGAAAGGUACCCUCGCAACACCAAACACAGCGAGCGGCGCAAACAAUCCCAAGAAGGUCCGAGACCGGAUUGCCUGCUAAGCCU
sq62	0.2	0.6	100	55	40/0	CCACCGGCACCCAAUCUCUGUACGAGAUCUGCCAACACGGCCCACCGCGUAUAGUAGCAUACAUUACACCAGAUCAGGUCCAGCCGUUUGUGGUCCUUGA
sq63	0	0	100	52	96/1	GAGGCUAAUAUAGGCUAAUAUGCCACGCACACCUCGUAGUGCCGACACAUAGUAUCUCUAUGCGUCCACUAGCCCGCCUCACCAUCACCAGCGUAAACGA
sq64	0	0.61	100	50	30/0	GCAACAUCUCGUAACUAACCUAACGUCCCAUCCGCCGCUGCACGCCGCAAAUGUUGCUAAACUUGAAUUGCACAUUCCCGUACGUCGCGAUACUUACGAU
sq65	0	0.04	100	52	70/0	GCUCUGCCUUUCUUCCCUGGAUGUUGCUAUGUGGCCUACCACAAGCCACAUCAACAGUGGCAGUGCGUAUGCCUUCCGCACGUUCACCUAAAGGCAUUUA
sq66	0	0.3	100	51	31/0	CAUACACUCGAAGGGUCAUUUCCCACAUGUGUAUGAUCACUUCAGAGUGACCGCGUCAUGCCCUCACGACACGUCGUCAGAGACGCGUCUUAAUGAAACG
sq67	1.2	1.6	100	49	4/0	GAUGCGUACGUAUGGGUCGGUAAUAAAGUUUACAGACUACCGCGACGAUUCCGUGUCUAUACCCUCCCUGCUGUUAGAACAGACGUCCGGGAUAUACCAU
sq68	0	0.6	100	50	12/0	CUUGAAGAGCAAGGUCGUAGACAGUGCCUAACGUGUCACACGUACCAAGACCGCAAAUCUCUACUGGAUGCGCGUGUAUUCCGUCAUUACGCACUUCUAC
sq69	0.17	0.9	100	50	1/0	AGAGGUCCUCAUACCUGUCAGAUAGACCUUAUGCCGACUGUCUACGAUCUCGCCUCAAAUCAGCCUAGCCAUAGAUUGGAUCAGGCAGAGUCGCAACCUU
sq70	0	0.3	100	50	100/0	CGUCCUGCUACUGGCAGCAGUUCCGCAUUUCGCCUAUAUUGAUUAGGCGCCAGUCAGCAGAACAUGCACUGCAAUUAUAACAGGACCAAACGCAACGCAA
sq71	0	0.3	100	51	43/0	GGACGCCAAGAGCCACGCUUGAUCGCGACGGCCUUGGCCAAGAAACCGCAACGCUCCCAUAAACAGAAACCUGACACUAUCGGAUAGUUAAUUUCUAUCA
sq72	0	0.1	100	50	67/0	GCAAGCUGCAAGAUCGAACCACAAACGAAUAUACUCCUAUUUGCUAGGUACAAACGACGAUUGCCACUCGAGGCGGCUUGCACAUCCUUGUUCCAAGCCC
sq73	0	0.1	100	50	64/0	GGAUCCCAAUACAUUUGCCAUCUAUAGAUGAGCUCUCCGUAUUGGUCGAUCCGGCCUAGGGCCCUACGAUAAAUUCAACAGGACGCGUUACGGCUCCAUU
sq74	0.8	1.3	100	50	0/0	GGUACUCUCGGAUCCUAUAAUACUACGCGGCUAGGCCACGAGCUUUAUAGGCCGUUUACCGUCACUCAGGUGACUGGACAUGUCAGCUUAAUUCAUGCAC
sq75	0.3	0.6	100	49	3/0	UUAGUCUAAUGCUCUCGCCUCUCAGUUAAAUAUGCAUUGCGCAGAGUCCGUAGCCCGAGUUCUCCUCGUGAGAACCGAUGUGAUCCUAAAGCGGACUACU
sq76	0.6	0.8	100	51	4/0	CUUGUCGCAAUGUUGGACGCGUGAUACUACUCAGGUACCCAAACAGGUCAUGUUAGGACCAACCAUGCGCGCCAUACAUUGGCCCACAACUUACCACAGA
sq77	0.4	0.74	100	54	1/0	AACCAGCCGUCCCUCUAUAGCCAAUACCGCUCUCUAGUAGGCCAAUACACUACAUCGCGUUCCCGACAGAACCAUCUUGAGGGCGCAGUGACGCGAUCAU
sq78	0	0.3	100	50	52/0	CUUUGCCUAUUUCGCAUGACGUGACAGGCUUCACGUCCUGGCAUGAUAGACGGAGAAGACUUUCUUCGAACGUCAUCCAUAGGCGCCUAGGUACGUGUUU
sq79	0	0.5	100	50	8/0	AUCGCUGGUUAGAGCUCCACAAGAAGGCGUGGAAAGACGGUGACGGAGUACACCUGUAAGUCCACCUCGUCUACCGAGUCUAUCCACGAUUUCCAAUAUU
sq80	0	0	100	50	100/17	CUUAAAGGUGCCUCUUCUUAGAUCGGAAAGACGAAUACACCAUGCUUAUCGCCCGGGAUGGUCUGAGCUAGUUCUCCUCAAUGAACCUCUCCAUCCACGG
sq81	0	0.55	100	49	53/0	CCAUCGGCCUCCGUUUACGUGACCAAAUUUAAUACCAAAUUCAGGGCAAACACUACGCACCUGUUAACAUAAACGCCCACGAUGGCCGGCACGUGUCUUU
sq82	0	0	100	50	100/3	CGGCAUUGCCACAUCAGUCCCUGCCAUCGCUAUGGAAUACAUAGCAGAGCGCAAUCUAGCUCAUUCAUCGUCAUUUACGGGCAGUUUGGACUGAUGUGAC
sq83	0	0.3	100	51	35/0	UAGCUGGCCCUUCUGUGAUUAGAUUUGGACCCAGGCAGUCCGCCUGGAUAACACCGAUAAAUUUCACCCGCCGGCACAAUAUAAUUCUCCGGAUCCGGUA
sq84	0.1	0.5	100	49	12/0	ACUCCAUAGUUAGCUACACAAGUUAAGAAUUCGGGUCGAACCUCACACGUCGCCACUAGCAACAUGUGAGGUCCCAGGAUUAGCUACAUCCGCUUGGAGA
sq85	0	0	100	50	73/5	AGAGAUUCAUAAUCGAUACUCCGGCUUAGAGCCCACCAGGACUCGGUGAAUCUGAAUCUCACAAUAUCCGCAUCGGAACCCAGCGUUUAGCUGGUAUGCG
sq86	0	0	100	49	83/7	CACGCACGGGUAUACAUCUUACCUCCAGCCACGCCAAUAGAAUUCUAAUAACACCAAAUCCUAUCAGGUGAAAUCUGGUGAGUAUAGCCGGCGCCCAUCG
sq87	0	0.01	100	50	100/0	CCUAAAGCUCCAAUUCGCAAGAUAACAGAGUAAGGACCAAGGCUAACGCAUGCUACAAAGUCUAGUGGCGUGGAAACACCCUCUACGACCGUAGCAGCCA
sq88	0	0.1	100	50	80/0	UGACACGUCAAGAACUUCAAUGCACACCCAAACGCCUCCUGCGACAUGUGGCUCAAGAAGAUCCUGACACCACGAGCGGCCCUAACAUGGAUAAUCAAAU
sq89	0	0	100	50	99/15	CACUACCCGGACAAUGAGUCCUUCCUACUGGCUCUCCUGGAACUGAUGGUAGCUUAAUCGCAACCUCACCAGGCAGUACCAGUACAUAGCCUACUCAAAU
sq90	0	0.01	100	50	100/0	AAGGGUGCAUAACUGUGCACUUCGGUAGCCAGGACGCACCAGCCACCCACAUUUCUCAAGCUACACCCUAUAGGCCAAAUAUCACUACUAUAGCGGUGAA
sq91	0.1	0.2	100	51	39/0	AACAUAGGAGAGAGUCUUUAACGAGAUAAAGAAAGGUACACGCGGACCGGGAGUACUGGAACCGGAUCUCCGGUAUCAACUCCUCCGGUGUUCCGACACA
sq92	0.3	1	100	50	0/0	UUACGGUACGAUAAGCCUCGCAUACCGUACACACCACCAGCAAACCAGAUCGCCGAUCACAACAAGACGUAAUGCACCGCUCUACUCUAAGCGUUAGCAU
sq93	0.2	0.6	100	50	29/0	AACCACUCUAACUCAAACAGAUCUUAGUAGCGGACGUGACGUGGCUCGAACCUACCUUAGAAGUCCCUUCUAUCAAGUUCUUAGUGCACGCACAGCCGCG
sq94	0.4	0.5	100	52	0/0	AAGUAUUUGGCAGCUUACGAUGUCGAGGAUCCCGCUUUCCGGGACGACCGUGCUGCAUCAUACUUCCUGGUGCUAGACCAAAGUAACUACGUUCACCGUC
sq95	1.16	1.65	100	44	0/0	ACGGUAAGGUUUAAGGUUGCCUGACACAAAUACCAACACCACAACCACCUGAACCUCUCUUAGGACAACAGGGAACAAUAAACCAAAUCUGUUGCCUUAG
sq96	0.6	0.6	100	50	0/0	CACAAAGUAGCAGAGCAAUUCGCACUACGGUGACGCUGUGCAUUACAUAAAUCCAGGCUCUGACUCGCAGAGCCAGCUAGGCCUGUGUAUCACAUUGAAC
sq97	0	0.06	100	42	57/0	GAGCUGUCUUAAUCCUAGAGACGAUCAAUCAGUAACAGGUACACUCUAUCGCCAGAGAAUUAAUACUUACCUUUGACGUAAACACCUCAGACGGCUCUUA
sq98	0	0	100	50	100/12	UACCGUUGACCGUCCAGCCUGCGAGAGCUGCUGUAGACCGUUAACAAUAAAUUAGAAGACACACCGGCGUAAGCAUCGCGAACGCAUUACGUGUCAGUAU
sq99	0.69	0.7	100	47	12/0	GCAAGCUUUGCAGACAAUAUAAUACGCAUUCUCGGUACAAAGAGCCGCUUACUCCGAAUAUGCUAAGCUUGCCUCUUAACACCCUGGCCAACCUCCUCAU
sq100	0.1	0.4	100	51	32/0	CAGGCACUGCGAGCAGGCGGCAUCUGCAACGUGACAUAUGCACAGAGGGUUCCUUUAAGAUCAACAGAUCCUAAAGGCUAUUCCCGCUCUCAUACAUCAG
mean	0.2729	0.5378	-	-	-	-
median	0	0.3	-	-	-	-

## Sheet: Table S3
Additional file 1:Table S3 The detailed results of four-target designs (RNAdesign dataset [4str]).
target	de1	de2	Nsq	GC	n1/n2	selected sequence
sq1	0	0.1	100	50	77/0	UAUGGCACAACCUCUUAUCCUUUCGAUGCGCAAGACAUGCCUAGAGUUGGGCAAGUGGUCUACUCUGUGUAGUCCAGUUGACAACUCCCAUGCUUGCGGA
sq2	5.7	8.2	100	50	0/0	CUUGAAGCGGUAUCUACUGCAGGACCAAAUAUGUCUUACAGCCACGGUCAUUGCUCAGAUAGGUCUCUACUUUAGCGGGCUAAUCGGGAGAGGGCCUCUA
sq3	0.6	3.2	100	55	0/0	CGCGGCCCUAGCAUGGAGCACGAACUCCUCACUCACGAGAAUACGGAAGGAUCCUAGGAGUAACUCCGCUCUCUCUACUGAACCCACAACAAAGCCGAAC
sq4	0	0.2	100	50	48/0	AUUCAUUGAAGAUGAUCUCUGCUACGGCCAUCAUUCCCGACCUGCCACUGGUCGGGUUCGGCUGCUGCUGUCUGGAACACUGAAGUACCAAUAUACAAAC
sq5	0	0.1	100	50	91/0	GGCAGCACCUCUUAUGUUACUAUCGCAGCCGAUCUAUGGACAUGCGGCGCAUGACGUAGCAUCACUGCGAUAGCGAGAACAUUAGUUCUCUACUCACACU
sq6	0	0.1	100	50	58/0	UGAAUACUAUUCGGCGAGCUCUAGCCUUAACUAACCAAAGCCUAACUUAGCGUACAUCGCAAAGCCCUAGCCCUGCUUCUGGCACCCUUAAGGAUACGCC
sq7	0	0.5	100	50	60/0	ACCCAAUAGUUGCCCACCGCAGGUCAACCCAAGUUAACCAGGAUAUACCCACACAUCCGAAUCGUUUAACCAUCUAAACCCGGAAACGGAUAGCUAGCCC
sq8	1.6	3.9	100	50	9/0	AUAGCCUUCAGCUUCCCGUUCACUAGCCAGUCCGACCAAGCGUUUGGUGAAAUCUUUCCGUCCGACUCACCUUCCGAUCAGGAGGUUUAUGGAGAUUCAU
sq9	0	0.1	100	50	71/0	CCCAGGAACGCCAUGCGGUCAUUCAACAUGUUGACUUCUAUCUCCUAUACCGGACUAGGAGAUCCACAACUGACCAAACCCAUGGCUAUACAGAUCCCUG
sq10	0.8	1.5	100	51	28/0	CCUAUUAUCUUGUCCUGGAAUGCCUACCAUUCCUGAGCUGUCAACGAGCGACUGCUUAGGCCUGGCAGGCCGACUAGUAUGCACUCUUCUACUGAUCAGA
sq11	0	0.6	100	50	19/0	ACAAAGAUUACCUACGUCGCAAUGAAGUCGCCCACACCAUCUUUGUAGCGAGAUCAAAGAAUGGACUGCGCGAGUCAAUUCUCACGGCGUAUCAUCGCCG
sq12	0.1	0.21	100	51	43/0	CGCGAGUAACUCGUGCGUCGCACCGACUGCAGUCGUUACUCCUGACAUCCUCUCGUUUCACAUACAAUUGAAGAAACCCUGAAACGUCGAUGUCGGCAUA
sq13	2.1	4.17	100	44	0/0	AUCUUUGCAACCAGACCCUUUGCCAAGAAAUUAGAGUUUACCAGCUUAUUAUCUUCAGGAGCUUCUAGUUGGUUGGCAUCGUUGCCGAUGAAAGUUCGCC
sq14	0.2	4.6	100	51	2/0	AACGCACCGUCCAGCACGCAGGUCCGUCAAUAGCAGUAAGAAUAGUUGCUCAGGCAAACAAUCUGAAUAAGGUGGUUAGACGACCAACGACACGCAACGG
sq15	3.9	5.4	100	45	0/0	AAAGCACAGGGACUACCAAGAUUACUUGAUAGUAAGUCGACCUAAUCAUAAACCCUCCGCCUGUAGCAUAUCCAUACUCCAAGCGUCUUGGAAGUCGUAC
sq16	0.4	0.67	100	51	26/0	GACCUGAAAUAUAACGAUAAUGGAGCAAACCAACCCACUCGGGCGGGAUUAAUCCCUGACUGAUAUCAAGUAGCGCGCUCAUUUGCUCGCCCGGUUUGCC
sq17	1.1	2.6	100	56	6/0	AUGACAGUACUACUUUCGCGCUGCGACUCUGACCAAGCAACGGCGAAGAACGUAACAGCAGUAGCCACCUAUGGCGGCCCGCUACCGCCACAGAUUUCGU
sq18	1.39	1.61	100	49	0/0	CCACACUGACACUCUCAAUACCUAGGACUGAUUAUGAGCUGAAUUCCUUCCAACAAUUCUGACAUUGGUGCUCCGUUCAAACGGCAGCAAGUGCGCUGCC
sq19	2.6	3.2	100	49	0/0	AGAUUGCGAUCUUCCUUGACAGUAUCAAGACGGCAUACGGCCGUCACAAUUGAUCGUCCCAUCGACUUCCAAAGCGAAAUCGACAAUUGCGCCACAAGAC
sq20	1	2	100	50	7/0	UACGCACGUCAGUACGAUGUCUCAAUGUACCCAUUGAGACUAGGCAAAGAGCACGUAGACGGACGUUAUCGGUACGUCUACCGACCUUACGUAAACGACC
sq21	2.1	2.7	100	54	0/0	GUCUUGAGGCAUGCCAACGCAGGAUCAUUCGAGCGAGACAUGACCACGAAACUGUUGGGACUUCGUCCUCUAUUCUCCGAAGAUCGCACGACACAACCGG
sq22	1.8	2.6	100	39	0/0	UACUGGAGUAGUCUCUCCAACGUUGGAAUUACUGAAGUAUAACCUCAUUACAUCAAUGAACAAUCUGAGUAAGAUGGAAUGCACCUAGCAGUAAGGAUAG
sq23	3.65	3.95	100	50	0/0	CUUGCUGGAAUACCACCCGAGCGCGACUGCCAGCGCUCUUCCACAACUGCCGAGUCGUAAACUGACUAACCUUUAAUUACUGUACAGUUGUUGUCUUCAC
sq24	1.1	1.8	100	51	2/0	CACCUCUGUCGAAGAUUGAGCACAAGCGCCAGGCAGCGGCCCGCUUAACCAAUCUCUUUGACGAUGUAUAUAGUCGACUCCCGCCCAAUUUGAUAAACCA
sq25	0.4	0.7	100	50	30/0	CAAUCACCCUUUGUGCACUAUCGUGCGUGUCUGACCAGAGACUCGUAGUAUGUCCACACCCUACAUAGUACCUGCCCACCCACGUAGAUCUAAUUCUUGG
sq26	0.3	0.7	100	50	12/0	CGAACCACAAUAAACCAGUUUCCUGUACCACCUGCGAAGUACACGCUACUUCAUCUCUAUGGAGUCCAUACUGAAGGCAAGCGUGGACUCAGCAGGAGGA
sq27	0.3	1.84	100	50	0/0	CAAACAUACUUUGCUGAAGACGUCCUCCAGUCCCUGGUCGUGGGACAAGAAAGAUUUCACCUGUACUGAAAUAAGUAGCCCGGAGCCCGGACUAGUCUUC
sq28	0.38	1.48	100	48	12/0	AAUUAUUCCCACGGGAUCCUGGUUCGAAACUCAAAGGUCCGCCUUAACCCGAUCCAACUUACCUUAACCCAUGCAAUUCGAACUUGGGCCGAGGAGAAUU
sq29	0	1	100	48	16/0	GACAGAAACGCAGUAUGUCACCUACACCUGAACGUAGGUACGCUACCGGACAACGUACUGAUCAUUCACAAUCAUACGGAGUGUCCUCUCCCAACGAUUA
sq30	0	1.8	100	50	9/0	CAAACCGCGCGGCCAGCAAUCGUACUGCACGAGCUUGCAUAUCAACGAAACUGAAUCAUCAGUGAGCACGAUGCACAGUGUCGUUCUACUUCUCUACUCA
sq31	2.68	3.01	100	47	0/0	CCGGGCCUGCAUAUGUCCUUCAAAGAUCAUAAUCCCUCAAACCUAGGAAGAUAUAAGCAUCGAUAUGCGAGGCAAUUCAGCAUCCUGCAAGUCCUGUAGG
sq32	0	0.7	100	46	17/0	AUUGCAAUUGCCCACAAAUUCAAUUAAUAGGAGGAUCGGCCCUCCACCAAACAGGCAAUCUUCCACAUCUAGAUGGCUGUGACUCUAAAGCAGCACGAUG
sq33	0	0.2	100	49	70/0	GCCCAACUGGGAAAGAGGCCGCACGCUGAUCUCAGCCCAGCGCCCUCUAUUCCAGUAUGGAUAACUCUAUAAGCUAAUCCUUAAUUCUGAACCCAGUUAU
sq34	1.83	3.07	100	41	0/0	CAAUUCUCAUCCGCCAAACCGGUAUCGAUCUUGUACCCUAAAUAACAAGUUACAUAUGAUCCGCUUUCUUGUUUAUCUGGUAGACUCAGCACUUACACGA
sq35	0.26	2.05	100	43	1/0	CCAUCACAUAAUGCAACAUUGCCACGAUUGUUAAAUUAUGUCCAACACAACUACCCGAGCUUAUGUCGUAAUAUCUGACACCUCACGAACAAUCGGGACC
sq36	0.2	0.6	100	56	40/0	AAACUAAGAGACAAGCCCGAAUCGGGGCAGUGCACUGCCUAAUGUGCCGUAUUCGGGCGCAAACGCCUUCUCAGGGAUUGCCCAAGGCCGAGACACAUCA
sq37	2.1	3.9	100	45	0/0	UAGGUAUCGCCUUCCAACUAAGGGAUAGACUACACCGCGGUUCUGGACUUAAGUAAAUUCCUACCCAUAGUCCUAUAGCAUACCUAACCCUAGGACUCUA
sq38	0	0.4	100	50	40/0	CUACUCGGGAUCCUACCAAGCGAGAAGGACUACUUCUCGUUUCCAUGCGGAAGCCGGACAAUACGCAAACAACCAAGAGGAACUAACAAGGUAGGAAACC
sq39	1.7	1.8	100	48	13/0	ACUCACGCCAGUCCGUGAGGAUGACACAGUUCUACUUGAGAGUUUCAAAGCCCGGAUCACACACCUAGAAGUAUCUCCUCAUCAGAACUCGCUUAUGACU
sq40	0	0.1	100	50	59/0	GCUCCGACUGACUGAACCCAACGAGGAGGAAAUGCUCCCGCAAACUGUUCCAAAUAGUCUCUCGGAUAUAAACUACGAAGGCCAACAGUAAAGGCCAUGC
sq41	0.5	0.7	100	49	0/0	UGCCGUUCGAUAUCAUUAGCAUAUUAUCUGCGAUGUGUCCGCACCAUCCCAUCAUACCAGGAGGGCGGACCAAAUGCAAGCAGUACUUGCAUAAUGCGCA
sq42	0.2	1.4	100	52	17/0	UCCCGCUAUCAGAACUACCGAAGCCCUAGUCUACGCCUCAUACUCUCAGUUCAUCUGGAGACCUUCUAUUGCACUAUGGAGCACGCGCGACAUCUCACCU
sq43	0.79	1.29	100	45	17/0	AUACCACUAUGGAUCGUGAUGAGCCGCAUCUCAAACCGCGGCAAAUUCACUCCAAACAACACAACAUCCACAGUGUGAGACUGAAUUGUGAAAUUGAGAG
sq44	0.85	1.55	100	48	0/0	UCUUAGAACGCUUCCUCUCUAAAUGUUAGUUCCUUACCCACAGCUCAAACCCAAGUACCUUAGUGCCCGCUCGUAUGGCACUAACGGCUCAAUCCUCACU
sq45	0.4	1.9	100	50	0/0	UAAGAGAUUCUAGCACCACGUGCAAGCUAAGUUGCCAGCACUCCUACAGCUCGAAUCUCACCACUAUCCCUUAGAGCCGUUCAUGUUACCCUCCAAUCCC
sq46	2.43	2.89	100	50	0/0	CUUCCAGAUUUCCACACGACUCGUAUACCGCCACGGCUCGCACUGUAGUUGCACUUCAACUACAUCGAAGAGCAUCCAAGGCACACCUUCGAUCAAUCAA
sq47	1.1	1.2	100	50	0/0	CGCUGCCAAACGUCGAAACCUAUCGAGACCCGACUUACCGUUAUGCUCCGAGUAAGUCUAAACACGCAAUCGAAGUGCUACUGCAAGUCGAUGCCUCAAU
sq48	1.5	3.4	100	35	1/0	ACGUCAGCCAUAGAUAGUAUACUAUACAACCCAUUGGUCUCUUCACAUAGACUUAAUUUCACUUACGAAUUUAAGGCUUCUAUAGAUAAUAGCUUCUCGA
sq49	0	0	100	50	100/9	AACAAGCUCUCAGAGCAAUUCGCUCUGUCUGCAUGUAACACAGCGGCCCUGUCAACAACCACAUAACCCGACAGAGCCGCAUGUCUUACCUGACUUAGUA
sq50	0	0.9	100	50	17/0	UGCUUCGCUAAGCUUCAAGACCGUUCACAAGCGCUGGUCACAACUUCGAGCUGGUCAAAUUCGGACCUCAAUCGUCAAGUGACCAAGAUACCUACCUCGA
sq51	4.26	5.76	100	53	0/0	CGGUCAUGAGCGUGUCAAUUGGUGGAGCCUUAAACGGCCUCCCACGCAGGAUCAGCUUUACCACACGUUGGACUACAUAGCUCUCUACUCCCAGGAAAUC
sq52	0	1.4	100	50	28/0	UGUCCGACGUGUCCUAAGCUCUACGCUAGAACACGCGAGAAGCUAUUACAUUGUCAGGACCCGUCCUCCCAAAUAGGUUCAAAGUUAAUCCGGGAGCUUC
sq53	0	0.2	100	50	70/0	GGUAGGAACAGCAAUCAGGAGGACUCUAAUCGAGUCCAUAUGACGAUCCGUUUAGCUUUCCCGGUCAGGAUACCCUACCAGAAACGGGUAUCUGUACCCA
sq54	1.7	2.55	100	50	7/0	CCACUCAUCUGGGUACGCCCACUGGAAUCAAUUCCAAUUUCUAUCUAUGUCCCUCACGACCGGUUACCCAUCAGAUAUGGAUUCCUGCGCCAGAGCCUUU
sq55	0	0.5	100	48	58/0	GCCUCAGGCUUUCUGGUUGGGACAACCAUAAGUAAUUAGGUCCCUGUAGGAACUGUGCCAUAUGGCCUAAGUCCCAACAGUGAUAUAACAUAGCCUGUGG
sq56	2.7	3.4	100	47	0/0	UUACUUGAAAGAAGUUGAGUUGAACCAAGGCCUGUAGUCUCGAUUUCUUAUCGGACCCGCUCACCUUAAGGCUAGCGAGUCACAGACUUCGCAAGCUUGU
sq57	0.3	0.9	100	50	27/0	UAAGCACAGCUGACAACACUGCCUCCUUGGAGAGUAAAGGAACUGCCGAGCCCGACUGACGAAGCAAUGCAUCACAGUCUAACGCUCAAAGUUCCACAAU
sq58	0.9	1.9	100	50	0/0	GUGUAACAGAAGAUUUCCGAUUCCACGGAACUGUUCUUGUGACAGUGCGCAUCCGCCUUGGAACGGACUGGACCAAAGAAAUCGAGCUUGAGAGAGACUG
sq59	0.7	1	100	50	0/0	UAUAAUCCUCAGUGUAGCCGUACGUUCAAAGUACACUACACAACGGAACAAUCAAACCCGAAGGGAGGCAAUAAGGUUACCCAAGGGCCCACCUACGCCC
sq60	2.12	3.02	100	50	2/0	ACAUAACCCGCUCACACGACGUCAAGGACUCCUGCAUAACGAACCAACAACUAGAAUGGGAACCGUCGUAGCCGUGAUUCGUCGGUUCUAUCGGACUUUA
sq61	0.68	1.4	100	46	0/0	UAAACCCUUUCAAUAAUGAUUGGAACCCUUGCAGAAAUAAGCCCGGCAAGAGGAUGUUCUUUUGGAAUCAUCGGCUACGCCGCCAAGACUGCAGUUUCCA
sq62	0.42	2.22	100	45	4/0	GAACCGUCGCCUAGUAUAUGUAUUAUAUAUGACAACACGUCUCCACGAGUACAUCAUCAUCAUUUACACCAUACCCGGUCCAGACGUACGUUCUCGUAGC
sq63	0.1	0.4	100	53	34/0	GCGAAACUCUUCGCUAACACAAGCUACACCUCACCCAUGGUGAAGUCCCGCGUUCUUCGUGGUACUACCAUACCCUUCGCGCAACCAACACCGUAUACGA
sq64	0	0.51	100	53	21/0	GUCUCUCCGCGGCACAACCUCACCGAAUAACUAGAGUCGGAUAGAGUCAAGAGAGACAUAUCACUAGACGUCCUCUAACAGUCGGAACGUCCCUGCUGCC
sq65	0	0.54	100	52	24/0	GUUGCGUUUAAGCCAAGCAAAUCCUGCUACCCGACAGGUUGGGAGCUGGAUUAACGCCAGCGCCACACCCGUCUAUUGUGGAUUUGGAAUUAGACGGUCU
sq66	0	0.8	100	51	17/0	ACGUGGCUUUAACGGUAUACUCCGGGCCGCCAUGUACCAGUUAUAAGCUCAGUAUGAGAUAAAGAGCUCGGACGAGCCCUGUCGUGCGAUAUCGUAAACC
sq67	0.5	1.64	100	48	0/0	GACGCAUAUGUAUGGGUCGGUAACCAAGUUUACAGACUACCGCAACAAUUCUGCGUCUAUACCCUCCCUACAGUUAGAGCUGAUGUUUGGGCCAUACCAC
sq68	0.8	2.1	100	50	5/0	GUGGUAGUGCUACAGCUCCGUCGGAGCCUAUCUCGACACGAGACUGACAUCCCAAGUAUGCCAAUCAUGUCUGGUGGCUAAAGAACUUAUGCUUUACGGA
sq69	2.7	8.1	100	49	0/0	UCGAAGUCUUGCUUAGAAUACGUAAUUUCGGCAGUGUUUACGUCGGUCUUCCCUUAUUAUGCCCUCGGUGCCGAACGCGAAAGAGGCGAAACCUGUUUCG
sq70	0	0.4	100	50	89/0	CUAGAUCCUGCCAGCACUACAAUCAGAACAAAGUGCAUCUGAGGCACUGCUGGCUAGGGUGUACUGGAACCCAAAUCAACGAUCUACAACCGGGAACCAU
sq71	0.1	0.7	100	50	9/0	GGAAUAGAUGUGUCCGGCACUCUCGCCUCGACCAUCUAAAUCUUAACCGUCACGUCCCAUACACUGUACACAGAUCUUAUCGGAGCUGAACUAAGGCUCG
sq72	0	0.77	100	42	9/0	CUCUGCUGGAUGAUCCAAUAAACGCAGAAACCUCAAAGUUUCUUACUUACAAAUAACCUCCGUAAUGUGGAGCCAGCAGAGGUUCCACUUCUUAAGUAAG
sq73	0.7	1.2	100	52	10/0	AGUCCUCCAUCCAGCUGGCCUCAAUCGAGGACCUUAAAGGAUGGAUUGGGCUGCAGAAGCUGCCAAACGAGAUUCGACCUGGGACAAUUUACUGCCCUUA
sq74	0.3	1.1	100	53	9/0	GAUGGAACCCGACGGCGACAAUCAUGACGUCCAUGACAUCUGUCUGUCGCCCGGAACAUCGGAUUACGGAAUCCCGUCCUUGGAAGCACUAAACAAGCAA
sq75	0.6	1.8	100	51	0/0	ACUCACUGAUUGAUAAUCCCACGCACAACACCGCAAUCGAUGUAUCACCUCAGCCGUACGUAAUAGGAAGUUACGACUCGCAGACCAUUGGAGGUGGGCC
sq76	0.6	3.2	100	52	12/0	CAGGGCUCCUAAAGGUACUCCGGCAUCACAGCCUGAUCGAAUUUCGUGGUGAGACUCCACCUUCCGGAGAGACCGUUUAGGUCAAUCCUUCUAUUUCCUC
sq77	2.06	2.5	100	50	0/0	CACUCCGCGGCGGAACUUAGCUAUUAAUGCUUCUAGUGAGCGAAACUACCUCAAUUUGGGCCCUAUAUGGCCAACCGAAGAGGCAAUCAGCCCGAAUAAC
sq78	2.4	4.9	100	47	0/0	AUACUGCUUUCCGUAUCCGAUGCGCAGCAACGCGUCGCUGUAUUGCUAACUCAACAACAAAUUGUUGGAGGAGUAAACAAAGUGUACAAGCAGACGCCUG
sq79	1.1	2.2	100	53	0/0	ACACACUCCGAUGUGAGGGACGUGAAGAUCUCUAAUGGCCAUGGACCUCAAUGGACCCACAGGGACCUCCACUGGCUCCAUCAGAGGUGUUCAAUUAAGC
sq80	0	0.1	100	50	66/0	UAAACCGGCACAGAGUAACCUCGAUAUGUUAAUCCCAUGCCAAGUGAUCAACGAGCAGCUCUCCAAUCUCACGGAUCACGGCCCGUAUUCGAGUUGUCUC
sq81	1.2	4.6	100	47	0/0	GACCGGAGGUUAGUGUUAGUACAACUUAUUACAUACAAUAACUACAGAAUCCCACACUCGUAGCUAGCGAACGCUUCAACUGGUCUCUGUUGCGGCACCC
sq82	0	0.81	100	49	31/0	GGGCGCGGCCAUGGGUAUAUCGGUCACCGAAUGCUCAACGUAUUCAUAGGCCACUCUCCCUACUCAAACAUUAAAUAUGGACCGCGAGUGUACUUAUGAU
sq83	0	1.1	100	50	25/0	ACCCGCGAGCGAACUAUGAAGUUAUAGCCACUGCGUGGCAAACGCAGAAUACAGCUGGACCAACAUACAUCGCGGUCGUAGUAUAUAAGGCACAAGCCAU
sq84	0.1	1.4	100	50	1/0	CAAGAUAUCUUUGGGAAAGACCCAAAUAAACCGGAACAAUCCCGGACCAGUCUCACGAAGCCUCGUCUGGGAUCCAGGUUUCCCAAGAACCAGAGUCUUC
sq85	0	0.5	100	51	28/0	UGUGCACCCAAAUUGGCAAUCUCCCUGUAUGGGCAUCAAGACCCGAUGAACAGGGUGCACUGAUGAGACCACAGGUCGAUUACUUCACGGGUAAAUGUGG
sq86	0	0.7	100	50	36/0	AAGAACGGCCUUUGUACCGUACCAGCCGAAACUGCCAGGUAAAUACCAGAACUACAAUUCACCUCAGUAGACAACGGCAGGACGAACGCUUUCCAACCAC
sq87	0.2	0.89	100	51	2/0	GUACUCGUAGCUCCGAAAUCUCCCUAUCUACUUACAAUAAACCUCAAGGAUGCGGAGAGGGCACUAUGCAUGGUACCGUCACAGUCGCCAUCCGCAGGUA
sq88	0.3	1.6	100	51	5/0	UUCACAGAUCCGCAUGACCUUUGAGGUAAACUGUCAGAAAGACUACGACCCAUUUCGUCAAGCAGAUCAGCCAUCAAGCGCCAGCCACGGACACGAACGA
sq89	0	0.5	100	49	29/0	UACUACAUGCCCUAUGUGGGCUCACUCCUGGCUCUCAGGAACUGUUCGGUGUAUGUCUUUAAACCAACUCCUGAAGUACCAGGAACUAGACACCACACCA
sq90	0.14	0.5	100	50	4/0	UGUGUAGUUUAACAGAUCCGACUUCGCGACUGCUCACUACGGUCUACAAACUCCCUUACACCUGAGGGUUUCCUCAGCUUAUCAUCCGGAAACGCCUCCA
sq91	0	0.3	100	39	45/0	AUAAUAGAUUACACUAGUGCAACCGGGCACUAAACAUUAGCAUGAUCUGUCACGCUUCUCUACAGUAUCCUGUAAUGAUGUGAAUCAGUUAUUGAUAGCG
sq92	3.3	4.2	100	50	0/0	AUGUACCGUAGCGACUACUAGACGGUACGGAAAGCAAAUCCCAUCCCAUUUACUAGAUAGACCCUCCUACAUGCCCGCGGACUGUGGAAUCCGAUAGGUA
sq93	0	1.6	100	50	9/0	AGCCACUAUCAUACUAGAAGUCCUGAUUAGCGGACGUAUGGCGGCGCGAGAAAUUUCUAAUUCGUUGAAUUAUCCGUCUCACCGUACGCCUACAGCCGCC
sq94	0	0.3	100	55	74/0	AGACCUAAGGUACGAACGGACGCCUUCAGGCUAGAUCCACUAGCAGGCCCGCGUACACAAGGUCUACGAACAGUGAGUUCAGGCCGUCAGAUGUGUUCUC
sq95	0.35	1.51	100	50	0/0	CGGGCAUGGUAAUCGUAGACCAAUCGCAACACUCUUAAAUCUCUACACCGAAGCCGCAGUUCGGACACUUGGGCUAACAUUACCUUAACGAGUGCCGUAC
sq96	0.7	1.3	100	50	1/0	UGUCUAACACGUUAUCACAACGAGACAGCCCAAGUACUCUCAUACCACAACAGCCGGAGCAGCAAGACUGCUUCAGAUUCCGAUUGGCCUCCAGAGAAUC
sq97	0.7	0.84	100	51	22/0	UGUCGGAGCCUCACAGUAGCGGCUCUCAAGACGUUUAAGACGAGCUACAGCAUUAGCAUAAAUACCAACGGCUGAGGCCAUCAAACACGUUCCGGCAUAG
sq98	0	0.2	100	55	89/0	AGACGGUUCCAUCUCGGCAAGGUACGCCAGUCGCAAGAGGGAACCACAAUUUCAUUAGCUGGCCACGCGAAAGCCACGCGAUCGCACAUUCCAGCAUCUU
sq99	0.79	0.8	100	49	19/0	GGCAGAAGAGUUUCCUCACCUCCCAGUUACGGCUUACACUCGCCCUACGAACCAAGUUAUGACGCUUCUGCCAGAACAUCCAAAGCGUAAACGAAAUCAU
sq100	2.8	4.2	100	52	0/0	CAUUCAGUGGUAUCACCCACCAAGUGGAUGCUCUCGGUUGGAGAUAGCGUACCUUGUCGGUCUGGAGACCUACAAGGGAAUUCGCGAUAGCAACACAGGA
mean	0.8438	1.7765	-	-	-	-
median	0.39	1.4	-	-	-	-

## Sheet: Table S4
Additional file 1:Table S4 The detailed results of two-target pseudknot designs (PK60 dataset).
target	de1	de2	Nsq	GC	n1/n2	selected sequence
no1	0.2	0.5	30	45	10/0	AGUGCUAUCCGCAUCUGUAUUCAUACAUAGGUAAUAUACGAGCGCGUUCGCAAGCUCUCA
no2	0.5	2.7	30	48.3333	0/0	CCCUAGACACCAGUACCAAGGAAGAUUAAUUCCAACGCUCAAGGUAAAGAAGCCCGAGGA
no3	0	0.199999	30	56.6667	19/0	UCUCCGCUAAAGUGUCCCGCAAUGCGGGUUAACUGAAAUACCGGGAUGUCGGAGCGCCGA
no4	0	0	30	48.3333	25/5	AACCACACCAUCUCUGUCAAUCAUGGCAGAAGAGCAUCCGGCCUUAACAGAGACACCAAU
no5	0	0.699999	30	51.6667	2/0	GCGACAUGGCCGACUCAAGCCGUCGGCCGAUGUUAUUCAUCACAAUAGUCGAGUAUGGUU
no6	0	0	30	51.6667	6/2	CUCCCUUCAACGGUGGUCCGCUACAUGAUGACAGAGAGCGGACUAUAAUGGUCCCUUGUA
no7	0	0	30	50	30/7	ACCUCCACCUCUGCACUGUUUAAUGUCGGCAAUACGCUGACUCGGUGCUCUUUAAUCCUG
no8	0	0.8	30	48.3333	3/0	CGAACUAUAUCAUUCCCAGCACUCAUCAACCCGACACUGGGUUUCCGUAUCACGUAUUGG
no9	0	0.199999	30	50	23/0	UAGUCCCGCUACACUCUGAUCCCUAAGGACACGGGAUACAGAAAGCUGCACGAUCCAAAU
no10	0	0.1	30	53.3333	10/0	CUCCUACAUUGGUAGGUGAGCUCUCGUCGAUCUGCCACUGCUCCUUCUCGGCAUAUUCAG
no11	0	0	30	50	30/9	AUAAGUCGACUCUUUAUCGACACCCUGCUCUGGAACCUAGCCAAAGCGCUCGAGACAACU
no12	0	0.099998	30	65	23/0	CGGCACGACCCGCCAGCAGCGCCUAAGCGCCAGACAUACCGUCUUGCGACCCUACAUCGA
no13	0.2	0.3	30	51.6667	3/0	GCCUACUUCGUCUGCUCAGGCUCUGCAAACAUCGUCCUGCCAUACGUUGCAACCAUGUUA
no14	0	0	30	50	30/12	UUCGAUCAAGCUAAUGGGCGCAAAGACCUCGUAUGGGCAAAUACGAUCUGUAACGGUCGC
no15	0.3	0.6	30	51.6667	0/0	CGGGAGCAAUUUAUCGGCAGACGGCCGAACGAUAAUACCGUUUGGAUAACUACCACAGGC
no16	0	0.4	30	63.3333	11/0	GGGCACCGGCGAUGCUAAAGCUGAGGUGUCAGCUUGCUUCUGCCCGCCUAGAGCCCUGGU
no17	0	0.099998	30	56.6667	12/0	GGCAGAAAGCGACGCUGAUCGUGAGUGGAGAAGAAGCACACGACGUCUAGCGCGCAAGAU
no18	0	0	30	50	21/5	UAUACUGGUAGGCACCGACUGAUCAUCAUCAGUAAGAGAGUCCUUGGGUAGCCACGUGCA
no19	0	0.6	30	53.3333	6/0	GUGAGGAAAGACGCAUGCGGAAACGGCGCAAGACGCUUUCAUCCAUCAUAAGUUGGCCGA
no20	0.399999	0.399999	30	58.3333	14/0	CGAGUACCGCGAUCGGUGGGCAAGCACGCCCACAGUAGAUCGAGAAACACGAUACGAGGU
no21	0.5	0.7	30	60	1/0	UGGAUAGACAUGAGAGAGCAGACGGCUUUCGCCCUGCCCUCACCCUUCGGUCUGCUGGUG
no22	0	0	30	50	30/5	AGGCCCACAAUAACCUGCAGCCGGUUAAAGCAGGUUUAUUAAAGCGAGAACUGAGCUCGC
no23	0	0	30	50	30/20	UCCGCUGACACAUUACUAAACCACGCCCAGUUUAGUUCAGCUAGCCACGAGGAAACCUCU
no24	0	0.5	30	48.3333	6/0	UUUAGGGAGAAGGAGCCUAUUGAGGAACUCAUCCUUCUCUCCAUGUGCUCCAUAGCCUGA
no25	0	0	30	50	30/17	CGACACUACAGUCAAACAAGCUCAAUCUGAUGCAGGUCCGGGUUGAGGAACUGCUUCUGA
no26	0	0	30	50	30/12	AUACAACAGCAACUUUAUCCCACUCGGGAUGUCAAGCACGCCAGGUCAACAAAGCGAACC
no27	0	0.5	30	61.6667	4/0	UGAGGGUCGGCUCGCCUAAGGCGAUAAAGAGCCACACCAAACGAGGCCGACCGCCCAAAC
no28	0	0	30	50	30/8	AGCGAGAGCAGACGCGAAAGCACACAUAAGAGGCCGGACAAGUCAAUCAAUGCCUCAAAU
no29	0	0	30	51.6667	25/10	UAGGAGAGCCAACAAUCUUGCAAGCGAACUCAUGGUGGCGUCCAAUGCGAGAUAGAAGGC
no30	0	0	30	50	15/5	UUUCGAUACCACUCUGACUGGCACCGACCAGGCGGAAGUAAUUUCGAUUAACUCGACUGG
no31	1.1	1.4	30	45	1/0	UAUCGGACAGAGCACGACGAGACUAAGGCGAUCCAUCACAAUUUAGGACUACGAAAUUCU
no32	0	0	30	50	30/30	CUAAGAGGGUUUAGGGAGGUCCGAAAGGCCCUAAAUCGCUCGAUGCAACAAGCAAUCCAA
no33	0	0	30	51.6667	24/6	GACUCAACGCAUCUCGAUUCUCCCGUAUGAUGCCAACCGCCCACAUACGAGGGCUAAAUA
no34	0	0	30	50	12/3	CCCUUUGUGGACGUACGACAGCAACAAAUUUGCACAAAGGCACCACGUACACUUGUUGGC
no35	0	0	30	50	22/6	AUCCCAUUAGAAGUAGGACUUUACGACGCGUCAUCUAUGGCUAAUGGGCGAUCGAGACCG
no36	0	0.3	30	50	15/0	GUGCCAUUAAGCAUCACAAUCCCUCCGAAGUGCAUGAGGGAGGAUACCGACUAUCCCUAA
no37	0.5	1.4	30	58.3333	0/0	GCCUAGCGGCAGCAAAGCAAUCGCACGCGCACUCAACGGAUACUACAAGCACCGGUCAAC
no38	0	0	30	50	26/15	CGUAACUCUGACCCUUACGUCGUGACGGUCUUACCGAUGUUACUCCACACGAAGACUCAU
no39	0	0	30	50	30/27	CAACCAAGAAACGUCCGUGAUGUAUGUACGGACCACCAACACUGAACCUUGCCAGUAACC
no40	0	0	30	50	30/12	CUGUUCCGUACUACAUCUCAACGGAACUUCCGCACUCGAUUCCGCAUUCCUCGUCUAAAC
no41	0	0	30	55	19/4	AUGCGUCCCAACAUCAAGCAACCUAACCACUCAACGUGCAUUGCCGGAUGUGACCCGGAG
no42	0	0	30	50	30/30	UCAACUUUGAGGCAGGAACGUCCUAAUUAGCGGCCAAACGGUAGUUCCCGGGUAACCUAA
no43	1	1.6	30	55	0/0	CCUGGGAAGUACAGCCGUACCCUACGGCGUUCACACUUACAUCGAGCUCCGUUAGAGUAC
no44	0	0	30	50	30/15	UGGGUCGAGCCAGACCAUAUUCAUUGCCACUUAUACCUCUACUAAUAUCCACGCAGGCCC
no45	0	0	30	51.6667	14/2	UAGACUUUCGCAGACACUGUAACGACGUCUCGCUCACGAUAGUCAGUCACCAUCCUCGGA
no46	0	0	30	43.3333	21/1	GUUUAGAACUUCACAGAGAAGGGAUAGUGCGUCCACUGAUCCCUUAACUCUAGAUCAGAU
no47	0.7	1.5	30	51.6667	0/0	UCAAGCACUCUCAGGAGGCACUCGGGUUCGGAAUCUAUAGUACUUACGCACCUAUAGCGC
no48	0.399999	0.399999	30	66.6667	8/0	GGCACGCCUGGAACACUCAGUAUCCUUCGGCGUGGGCGCCUCGACGCCACACCUCCAGGA
no49	0	0	30	50	29/13	GCGGCUCCUCAUACGCCGGAACCUAAAUCGUUAUAUCUAUAUUUGACAUAACCCGCGCCG
no50	0	0	30	51.6667	22/5	GACUGGUGUGGCAGUCGAAACCUAGCAGGAUCGUGAUCCUACUUUGGGCACAAAGUUGGU
mean	0.116	0.32	-	-	-	-
median	0	0	-	-	-	-

## Sheet: Table S5
Additional file 1:Table S5 The detailed results of two target designs (PK80 dataset).
target	de1	de2	Nsq	GC	n1/n2	selected sequence
no1	0.7	1	30	46.25	2/0	UUCGACUCCCGUCACUAAGAGAUGUCGAACAUCAUGGGCACUAUACACGUCCUCUUACGUAUCCGUAUUCAUCUUUCACG
no2	0	0	30	58.75	19/1	AAAUCGGAGGCGGUAAUGGACCUCAAGUGCCGAGUGGCCUUGAGAUGCAGGUCAAUCCGCGUGGCCUGUCGUCACUCCAG
no3	0	0	30	50	20/8	AUAGGAACCAAAUCUACUAAGUUGUGACGUAUCUAUACUUGGUAGGGCACCACGAAGACGAACGCGGAUACCGCGGACCC
no4	0	0.099998	30	53.75	14/0	CGCCCUGCUGAGGCCUAAUUUACUCAAUACAUGCCGGAGUUACCGGAGACGAUCUACCACUCUGCAGGACCGUAACUCUG
no5	0	0	30	58.75	22/1	ACGCCGAGCGUGCGGAGGGAAGAGUAAACCGCUUUCUAGUUUGGAGACCCAAACCCACGGUCGUCCUCGCUACUCGAGAC
no6	0	0	30	50	30/16	CCAGAUACCAGUUAUCGGCUUUACCAUCCGCGAGUAGUACCUACCGGACUGGAAGAGUAGAGCUAUACUAUCCGGUAGGU
no7	0.5	0.6	30	61.25	1/0	CGACCGAGUCGUAGUUGACGAUUCCGAUACACCGUCUCCCGCGAUUGAGGCAGGCCAGUACUGGGAAUCCGCACGCGACG
no8	0.3	0.4	30	47.5	3/0	UAUGACAGAAGAAAGUCUUAUGGACGUUGAAAUGGUACAUCGGGCAUGCCCGAUCCACACUUUCCCAGCCAAAGAAACCC
no9	0	0.099998	30	58.75	8/0	UAGUGCAGAGUCGCCCAACAUCCUGCGACUAACCACGGCGGCACGGACUUUACGACCUCCGUCAGCAGCCAUGGUAAAGG
no10	0	0	30	50	29/14	UCAGCCGCUUCCAAGAUAUCGUUGGCACUAGCUCGGAAGUUGCCCAGCCAAUGUUCAUGAACCACAGAGAAUUGUCUCUG
no11	0	0	30	50	30/8	CCCAGUCCUAUGCUAGGCUUCGCCGAAACCAUAAGACAACCUCCGAACUACGCAAUCCGUUCUUCACUUGCUGAAUGAUG
no12	0	0	30	50	30/12	GUGCACAAGCCUCUAGCGAAGUGUACUAAUGCGUUCUGAGCUUGUUCAGUGGCAAACCAGUAGCUCACACAAACGCGGAU
no13	0	0	30	50	30/15	UUCCUUCCACAAACGUAGCACCAUCGUAAAGAUAGUGCAUCCGGAUCACGUGGAUGGGCGCGUAUAACAAGCGCCGUUAU
no14	0.399999	0.5	30	50	13/0	CCUCAUGUGAGUCCCAGGCCAGGCCUAGGUACCUAAACACGUCGUGCUGAUAAUUUACUCAGGUUCAGACACACGAGUAU
no15	0	0	30	50	30/5	CGUCUUAUAUGCUCCGACCAUCAACGGGACUUUCCCGUGCAUUAGGCGAUUGUAAACAAUACAACCGGCCGGGCUUUAGA
no16	0	0.1	30	50	4/0	CUGUAUUACUGUGCAUAACUAUUGCGCCGCUUGAACGACCAGCCCGCUUACAGGGCAUGGUGUACAACGGAGUCAGAAUU
no17	0.6	1	30	50	0/0	AGGGCGAGAAAGCAGUGAGGGAAAGGAUAAUGCCGAAAGCUACUGACAAGAAGACGCACAUCCUAGCGUAGUAGCACGAU
no18	0	0	30	48.75	21/3	AGUUCCGAGCUAUGAUAAGUUACGAACUUAACACGAUACUACGACAUCUGACACCGCCCGGAUUCUGCCCACGUGUCUAG
no19	0	0	30	50	30/12	CAAGUAACGUAGACGUUAGUAUCUUACUAUGCACCUCGCCUGUUCUAGGGCGAAGCUCUGAUACGUUUCGUCGACGUCCG
no20	0	0	30	50	30/8	GCACGGAAUAUGAGUACAUCAUAACCGAACGUUCAGUACCGAUCUCAGCAUUAUGGCGACCGGUUCCUGAACCGAGCGAU
no21	4.2	4.4	30	47.5	0/0	GAAGCCACGAGGCCGAACUCACGUGUGAUCAUUCGAGCCCGAGUAGCCAGACGAUUACGUCAUAUUAUAGUAAUUGAGUA
no22	0	1.2	30	56.25	3/0	GCCAUCUGCCAGCCGAAGAACAGUCUUCAAACCACUAACCGGCAUCUCGAGUCAUGGUUCCGCGUGCCCGGAACAAGACA
no23	0	0	30	51.25	26/6	UCAUGAAUACCUCGUAGCGCGUGGUGUCAGUCCUAGACUGACACCACUGGCUAACGAACGCCUUCUACACGGAUCUUAUC
no24	0	0.5	30	48.75	5/0	CUCGGUAACUACUAAGCUAAUGAGAAGUAGCCGACCGUUCACCGCUCAGAAACUCUCUCUAGCUCCUCAGUCAAGCUAUC
no25	0.7	2.3	30	51.25	3/0	CACCUACAUGCCUGUCUGAUAAAGCCACGAAACCGACCCAAACGAGCUGCCACACAGCAUUUACCACUUGUUAACCUCGG
no26	0.8	2.8	30	47.5	0/0	CUGCAGGCUCCGAGACUAGUUUAGUACCGGAUUAAGCUGGACCUAACUCCAAUUUAACGAGUCUCUUCGAGAAAGACCUC
no27	0	1.2	30	56.25	3/0	AUAACCGUACGCUAGAAUCCGAAGAACGCAGCGGACACCAACAUCUCGCGCGACCUCUACGCAACCGCACCACACAGAAC
no28	0	0	30	50	30/11	GCAGCUAACUCCAUCUGAACUCUCCAUUUCCUAAAUCCGCUUCUUCCGACAGGCCAACAGGAGUAAUAGCACCCAGAACG
no29	0	0	30	50	21/5	AGAUCCUGUAUUUCUAUGGAUAGACAGUGGACCGAGAUCCCACUACUCUGGGUUCCACGAACAUACAAAUACCGGCGGCC
no30	0.4	0.699999	30	57.5	9/0	UCUCGUCCGGCUGUCGCGCUUCUCUCCCGGGAACUUCUAUAUGCCCGACAGCCCUUCGACGGUCAGCAGUUACGUAGAAA
mean	0.286667	0.563333	-	-	-	-
median	0	0.049999	-	-	-	-

## Sheet: Table S6
Additional file 1:Table S6 The detailed results of two target designs (LE80 dataset).
target	de1	de2	Nsq	GC	n1/n2	selected sequence
PKB00002_PKB00004	0.2	0.2	30	46	5/0	AUAUGAAUCCCGACCUUAGCGUGUUAAGGCUAACCACACCACAACUUAGC
PKB00005_PKB00015	0.5	0.5	30	46.3415	6/0	UGAUAUAUGCCAGUGGAGAGAUUGAUCCUCGUUGAUCAGCC
PKB00008_PKB00031	0	0.7	30	50	6/0	AUUAACAACCACUAGCGCCCGACGACGCGAUUGUCGUAAU
PKB00010_PKB00066	0	0	30	47.5	22/3	UUAAUAAGAACAUCCGCACAUUUCGCGCGAAGCGGAAACC
PKB00012_PKB00268	0	0.2	30	50	13/0	UCUUUAUGCGCCCGACCAUAGAGGAGGUACAUCUUCGGUU
PKB00030_PKB00045	0.2	0.9	30	51.2195	9/0	CCAAUCCUCAACUAUGUCAACGCUGUGACGUCAUAGCCAGC
PKB00047_PKB00069	4	4.4	30	49.1803	0/0	AGAAUGAAGCAUUUGAAGGCGGGCAUCCCUUACGGACCCUCUUUAUUACUAGCAGGUGUCC
PKB00048_PKB00265	0.5	1.2	30	44.2623	0/0	CAAUUACGCGAACACUCCCAUGGGAGGAGAGAGUGUAAUUUACAUAUACCUAAGUCCUCUC
PKB00050_PKB00128	0	0	30	40.678	12/1	GUGUCAUUUCAUUGUCGUUGCUUGGACCUUGAAAGCAAUGACACGUAGUAUUAUCAAGC
PKB00052_PKB00107	0	0.1	30	44.2308	7/0	AUUUACUUUGCGUGUACUUCUCCACUCGAAGUAAGUCCUCCUUACGAGUGGU
PKB00057_PKB00072	3.6	3.9	30	49.2537	0/0	ACGCAUGAAGCGGGAGGUGGCUUCAGCGUAUUAACCAAGUAUGCUCACCCAUGUGUUACACAUUUCC
PKB00068_PKB00129	4.8	4.9	30	50	0/0	GUGCUCCUCUAUACCUCCUAUACUUGCUCCAACGGUAAGUAUGGGUCACACUGCUGAUCCCGUAUAGG
PKB00070_PKB00244	0	0.5	30	56.3636	3/0	AUGUGUGUUGUGCCACCCAGCCGGCCCAUAGCACAUAAGUUAGUUAGGGCACGGG
PKB00078_PKB00106	0	0.4	30	48.3871	8/0	UCCAACCUCUCUUCGGACAGUUCGCUUUGUCUCGAAUUGUUUGCGUUCUUACCCAGGCGAAU
PKB00080_PKB00132	0.2	0.2	30	46.9388	13/0	ACAUGCCCGAAUCAUGUUCAGAGUGGUUGAACACAACAACCACCAUUCG
PKB00088_PKB00127	0.2	0.3	30	48.3871	2/0	CAUACUUACGAUCCUGAAGUUCUUCCCUCUUCCAGGAGUUUCAGCCCAACCCAGAAGGGAAA
PKB00098_PKB00232	0.8	1.4	30	51.6129	0/0	UUCCGGGCGAUUCCUCGCAGCUCUUCUCCUCGAGGACAUAUAACACAUACCAACGAGAAGAC
PKB00131_PKB00205	0	0.006568	30	47.9167	29/0	ACGUAGUUUGUUCUACGUCGAUGUCUCGCAUUCCGGCGAGAAGAACAA
PKB00139_PKB00141	1.3	1.9	30	48.5714	0/0	UAGCCCAAGCAAGAGAACCAAAGACGAGCUACGUAAGCUGUAGCUUUGGUUUGGGCUCCAAACACUUUCG
PKB00142_PKB00231	0.100001	0.600001	30	43.662	0/0	CUCGUAUCAUCGAACUGAGAGAGCCUAGCCAACUGAGUGUUCGCUUUCUCUGAUAUGAUGUGAUACAGUUU
PKB00143_PKB00233	2.5	2.6	30	50.7042	0/0	GAAUUGAUCAAUCACCCUGCGCUGACCCUCACUCCAUCGGUGAGGGUGCAAUUAAUUUACAACUGGGGUGG
PKB00148_PKB00218	3.9	4.9	30	48.6111	0/0	AAGUUCCUUUAGGGUUCUGGUGUUACUUCCGCCAGAUAACACGGAACCAUUCAACCUAGAGGCUUUGGUGCG
PKB00175_PKB00259	1.6	1.6	30	47.3684	3/0	CACGGUACACCUAAACCGUCGUUUCACCUUACCGUCACAAUCUACCCAAUUAGGUGA
PKB00179_PKB00280	1.5	1.7	30	55.8824	3/0	AAAUUUGUUUGUGUGGGCGGCUCCACGGCAGCUCAGUGUCCGCCCAAGUAAGUUAUAGCUGCUGCCGG
PKB00180_PKB00212	0.100001	0.3	30	54.6875	4/0	UGGGAGCGGGCUUCGGCCCAUCUACUUUAGAAUGUCCCGGAGUCAGUUUCCGUCGUUUAAAGGG
PKB00190_PKB00266	0	0	30	51.0638	29/7	CGAGUCCCAAUCCGUCGAGGGAUUCUACUCCCUAACAACCUCGAUUA
PKB00207_PKB00213	0	0	30	51.1111	12/2	AGACAUGACGGCAAUCCUAUGCCCAGUGUCAUGAAGAACUGGGAC
PKB00211_PKB00239	0.3	0.4	30	51.25	3/0	CGUCACUACAGGAGAUCUCGGAGUCCUCCUAGUUCUUGACCACACCCGAUUCUGAGGUAGAAUGGUGACUCCGUCAAUCA
PKB00222_PKB00305	2.1	3.2	30	53.75	1/0	AGUUACAAUGGCUCAUACGCCUGUAUUGAGCGAGUUCGCGGCCGACCAACAGGUGUAACUAAUUGUGACGGCGCGGAACG
PKB00224_PKB00281	0	0.1	30	48.8372	10/0	GUACUCACCAUUCCUGCUAAUGCAAGUAGUUCCCGAAAGCAGC
PKB00230_PKB00273	0	0.4	30	58.3333	7/0	CCUCAGUAGUACUUCUGGGGGGAAGACAUAAUGGGCCUGAGUCCCCCG
PKB00248_PKB00257	0.399999	2.1	30	48.4848	0/0	CAUGUACUCCCUGGAGGAGGUGACUCGGGUAAUACACCUGAGCUUCCGUAUAUUAUUGUUAUCCGC
PKB00263_PKB00270	0.2	0.6	30	38.7097	0/0	UUGGUGAAGAUUCCUUACUUACCGGUAAACAACAUUUACCAGCUCCCUUUAUUAUGAGUUGC
PKB00269_PKB00272	1.4	1.4	30	43.9394	0/0	UGCGUGUGAUACCACCCUUUAUCUUUCAAGAUAAGGGAUUCACUCACACGCGCGAUGUGAGUAUUA
mean	0.894118	1.22372	-	-	-	-
median	0.2	0.55	-	-	-	-

## Sheet: Table S7
Additional file 1:Table S7 The detailed results of two-target designs with sequence constraints (RNAtabupath dataset).
target	de1	de2	Nsq	GC	n1/n2	selected sequence
alpha operon	0.3	0.3	100	50	0/0	CUCCUCUGAUCUAUCUCUUACUCAGCUCGCGAGAGCAAUGUAAGUAGAUGGUCAGAGUCAUAAAUAGUAGGAGUGCCGGUGAAGGCGAUUCUCACCUCACCACACUUCUGAGCCCACCAAUUCCCAUCCC
amv	0.6	0.8	100	49.6552	0/0	AAGUCGCUCCUCCACUGGGUGGACUUCGGAGCAGAUGUUGACGGCAUGGCCGACAUCUAUGCCAACUGUCAACAUCGAGACGUAUCUUUGGGUACAAAGAUAUGUCAAGGGUCUAAGAUUUCUUAGACAAAGCCGCAAGGCAUCC
attenuator	0.8	0.9	100	50.6849	0/0	GUUUGGGAGGCUAGCACGUGAGAAUAUAAACGGAAAUCAGCGCCUAUGGGCCGUCUAACGAUGGCCCGUUUAU
dsrA	0	0.3	100	49.4118	74/0	AAGCCUGGCAAGUCGCCAGGCAAUAAAUCAUAUAAGUGCUUCCAGCUUGUGCUGGUUUCGCUGACUCGCUUAUUGCGAGUCAGCA
HDV	0	0	100	50.3268	100/43	GGCUACGUGGAUCCCGUCGCCUUAGGGACCAGUAGCCUACCGAGCCUAAUAACGCAAGAUACGUUCUAGAUCACCAACGAUCUUGAACUAUCUAGCCCAUUCCGAGGGGACCAACUCCUUGGCAAUGAAGCUACGGUCCCAUUUACAUUCAUU
HIV-1 leader	0	0.6	100	50	30/0	GGAAUCGUUGGUUAGUCCAGACCUGAAUCAACAAAUUCUCUGGCUAACUGGGAACCCACUGCUUACUCUCGAACAAACAUUGAAGAGCCGAUAGUGGUUCCUUAUAGCCCGGCAGGCCCUCACCCUGUUCAUUCACCAGCAAUGGGACGUUAAACAGAGAACGACUUGAUCAAAGUACGAUCUCGCGCAUGAGGCGACACGGUAUAGUUUAACCCGAACAGGCAGAACACUGGCUGAGUGCCACGGCGGAACACUAUCGUCUAUUCAACGAGAAAGGAGG
ms2	0.2	0.4	100	49.3151	0/0	GCUGUUGUGUCCUUUCGGAUACAGUAGCAAUAAACCGCAUCCAGGGCACUGCUUAUAGCGUUCCUCUGUUUGC
rb1	0.7	0.94	100	49.3243	0/0	UGUUUGCCAACGAACCCGAAUACUGCGGGUCCAUUCAGAAGCCGCCUCAGCUUGGCGGCACGGCGAGUAAGCAGUGAGGGCGACAAUGAACGCCUGUUAAAUAAGUCAGCAUUGCUUGCUCAAUAAGAGAGUAAGUGAUGUUUAAAUC
rb2	0	0	100	49.5575	100/27	CUCUUCUUCUAAUCCUAAUGAACAUAUUUGGGAACACUCACGGGCGCUCUCCACGCGCCCACGAAGGAGAGGCAUCAGAUUUCCUACACCUCAAAUUUCAUCCUCCUUUCGCC
rb3	0	0	100	49.6454	100/12	UUUAAAUGAAGAGAGGUGGAGGGAUAGACCCGAGAGAGCCCGGCACGCCCGCAUCUGCGAGGCAGCCAAAGAGAACAUCCGUUUGAGGAUGACCCAUUUAGAAGGAGAAGAGCUGAUUGGGUAAGAUGAUUAGUAAAGAAC
rb4	1.4	8.9	100	47.9452	0/0	AAAUGCGGACACCACAGCAUCACUGGGUCAACACGGACCGCUAAUACUCACUUGUGGAACAGCACGUCAGAGGAAUUUACCCAACGCUCGUUUGAAGUUUUUCCACGUUAUGGCAGGAGCUUAAUAAACACACAAGACGACGUUGG
rb5	2.86	2.9	100	49.7512	0/0	AAACACCAUCAACUCAAUAAUGCCAUCUCGCGUGAUUAUGGCACGCAAGUUUCUACCCACGCUUUCCCUGCGUGGCCGGCAUUAUCCACUCCUCAGCCUCUUCCACGGCUGUCUACCCUCACUUUGGAGUGGAUAAUCUCCUUCAUUAUCUAUUUCAAUCCAAAUCCCACCUUAUCUACCCAUCCUUCCUCCACCGCCCAG
ribD leader	1	1.1	100	50	0/0	CAGAAUAUAGGCACAUAAAGAUUGUAUCCUUCGGGGCAGGGUGGAGAGGUGCGUCUGGGACCAGCCUCUGUGAGCAGAGGCACGUCGAAACAUCAGUCUCGUACGGGACUGACUGCAGGCUACCAGUAGCCUCCAACUGAAUAGAAGUAGAAGCACCGCAGGAUGAUAAUUACGUUCGCCAACACACCCUUCGGGCGAACGUUUAUCUCCUACUGCGAACAAGAUCCUAAGGUACGUUGCGACGUCCGUAGCGUACCUUACAAUAAGAUUAACACCGAAAUGGAAGAAGGAAACAAGAGAUAGG
s-box leader	0.9	0.9	100	49.7976	0/0	CCCAAAGCUUAACCUCAUUCAUCCAUCCGACACUCUCUCUCUUCACAAACUGACGUCUUUAAAGGGAAGGAUUAGUCAGUAGACCACGACCAUUCAAGUUGCAUUCGCAACGGGUCAAUAACCUACGACCCGGAACGAAAGUUCCACCAGGCCCGUGUCUCCUGUUAGCGUGCUGUGCACGCCCGAAGAGAGAGGCAGUGUUUUACGUAGAACGUUCUAUCAAUGCGGGCAUUGAUAGAACGUUCCC
s15	0.3	0.4	100	50	4/0	GUCUGUACAGUGAAUUAUACCUUACUGGCGGUGGAAAGUUAAGGGUCUCUGCAACACUUAACCGCAGGGCCCAG
SL	0	0	100	50	100/46	CCGUAAAGCUCAGCCAUCCUCCAAGUGUCUUGUAGGAUCACUGCAGUAGACACUAC
thiM leader	0.8	0.9	100	50.303	6/0	CCUUCCUUUGGUCUCGGGGUGCCCUUCUGCAUACAAGCUACCAAAGACGGCCUAGUCCACUAAGCCUAAAUGCUAAUACCUCGUCACCAUAUAAGCAAGCUUACCUGUGACGUUGUAUUCUAGCAGAAGCCAACUGUGCAAGACCUUCCGCGCGAAAGCGCAUUG
mean	0.58	1.13765	-	-	-	-
median	0.3	0.6	-	-	-	-

## Sheet: Table S8
Additional file 1:Table S8 The detailed results of three-target designs with sequence constraints (RNAdesign dataset [3str]).
target	de1	de2	Nsq	GC	n1/n2	selected sequence
sq1	0	0.1	100	50	100/0	AAUUAAAUUCGAAUCGUGGCACAAUCAUAUCUAGUACGAGCGCGGCUCCAUGUCACUGGUCUGGAAUACAGAGCAGCGGCCGGAGCCAUCGUCUAGAUCA
sq2	1.1	2.1	100	54	0/0	AACAAGGUGGCUCUGGCCACAUGGUGUAACAGCCCAUCGCAACAUCACCAAUGAUUGGCCCGGAUCUCUCCGUGAUAUACCAGGCAAUAGCGGGUGUUCC
sq3	0.1	0.5	100	51	0/0	CCGAGCAUAUCAAUCUCCUCUUAUGGAGUCCGAAACGAGACAUAGCGCAAAGGCCCGCCCAAAUGGCUUUCUCUCACAGGAAUCCCACAAACAGCUCCAA
sq4	0	0	100	50	100/58	UUCAAGGCGACAAGCCGAAGGCAACAGAGUCACAAGAGUGUUACAACCCGAUACUCAAUCUCUGAAGCAGGCGACCAGCGUUGACUAGUCUAAUAGCCCA
sq5	0	1.8	100	50	100/0	AACGUCAAUCCCUCUGGCCGACUAUACCGAGACUGUUCAAGGAUCAAAGAUCCAGAACACGUCGGGUAUAGUCAGCAGUGAAAUCACUGCACCCACCACU
sq6	0	0.1	100	50	26/0	GCAAGAAUCGACCCGCUGCACACGCUCUUUAACCUACAAACUCAACAAACGGGAGAACCGAUUGCAAUGACCAAGUUUAGUGCUCAAGAAGAGACCGCGG
sq7	0	0.1	100	49	58/0	UGUAUCUUGAAGUCCACCUUCGGUCUUCUAAUGAAAACCUGGCUACUUCCUUUCGGCCGUAAUGAGAGACACUGCUCUCCCGGCAACGGCUUUCAAUUCC
sq8	0	0.2	100	51	63/0	UAUCAUGGGCUGAGUGGUCACAAAUUAGCUGAAGGCACCGUGAUCUAGUGAUCCGGCACGCCAUCAGGGGAAGCGGUUUACGCUUAGAGACCCACAAUUU
sq9	0	0.02	100	50	100/0	AGACCGGCCGCAGUGUGUCAAAGGCGAAGGAAGCGAUGAAGCACUGUAUUAAGUAUUCAUCAGCAUCCGAGCCAAACGACCACUGCAAUUACCAUACGGU
sq10	0.4	0.91	100	52	15/0	AUAUUUACCCUACUCCGGGAUGAGCUCACCUGUACUACUCAGUUCUCCUCUGCGUAGUACUCGUGCGCUCUGAUCGGUAUCUUCCUUCUUGCCAGUCGGG
sq11	0	0.1	100	50	76/0	AUAAACAUAAGAAGGGUGGCAAGCUCCGCUAACCAAUGCACGUGCUAAUUUAAUGCACGUCGCAGAGGCUAGCUAGCAGAGAUACCGCCUUAGAUGGCGG
sq12	0	0.7	100	50	77/0	CGAGGUAGCCAAUUGGCGACCAAGUCGGCUACGAGGCUACCAGGCAUGCAAGGCUACCUGGACACACAAAUUAAACAUACAGGUAGAGGCAUGUUUCAAA
sq13	0.1	1.3	100	47	7/0	ACACCCUGAGUAAACUAUGGUCAAGGUCAGUUGACAGAACGAGCUGUACUAGAUCACAUCAGCGUUAGCUUUCCUUGAAGACUCAAGGUUGGGUCCAGUG
sq14	0.1	0.2	100	46	52/0	CGAACGGCGUACAGGAUUAAGCCAUUCAAGAAGGAUAUGACACGACAUGCAGGCAUGAGAAGUCUGAACAGCCAUCUAUGAAGGCAGAAGAAACCAAUGU
sq15	1.1	2	100	49	0/0	UAAGUGGGCUCGGUCAGAACUCUGGUCCCGACCAGCAGCGUAGAACGAAUUAAUAAAGCAGCCCUACAAGCCUAAGGAAGGAUACAGUUCUUGCCGUAUU
sq16	0	0.2	100	50	36/0	ACUCAUAACUGCUUAACACUACUAGGUCCGCACGCAGCUAUGCUGGGACUCGUCCCCAUCAUAUAAAUUGAAGUCUGUUAGCUUACCGACAAGCGGGCCG
sq17	0.4	1	100	50	1/0	CUAACAUCUGCUCACUGGAGAUUCGCACCCAAACAAGAACAGUCCAGGGCCGAAAUAUCUGAGCUUGAAACCCGUCGUACCAAUCGGCGGCUUGAUUUAG
sq18	0	0.22	100	51	26/0	CUAACAGUCCAGCCGACCACCAACGCACGCUAACGUCUCCACCAAGAAUGCUUACACCUGUUACAAGCUGAGAAUGAGCCCUCCUUGAGCUAUAUCAAGG
sq19	0.5	0.5	100	50	0/0	ACUCCUUCUGCUGAGCCGAAGAGUGCGGGACAGUCACUAAUUGUCGUAACCGCAGACUAUAAUCCUUGAAGGGCAUCAUGGAUAGGAGAGCCAUCGAUAC
sq20	0	0	100	50	100/14	AGGUCCGCGAUUAGGUACGCCGUGGUCUCGUGACCAUGGCAUAGGUAAUUCCAAUCUUUCUUCGCAAUUGCCUCAGAAAGGGUAUGAACACCUCCGCAAA
sq21	0	0.1	100	54	41/0	GUGGGCUAGAAACCUUAAUGAUCCAUUCGGCACAUGCAGUUUACUUGCCGGCAAGGCUCCUCGGCAUAUAUUAAGCAGCCGAUGGCGCGCACAUCCAGCC
sq22	1.1	2.2	100	48	0/0	AGUGAGCGUUUGCACGUUCUUAAGGACCAAAUGAGCACCGUCGCGUCAGAGUGGUGACCUAACGGACCCUCUUCAGCCUGGUAAUAGAUCAUUAAAUUUC
sq23	3.4	3.5	100	43	0/0	GCUUAUCGGGAUUUAAUAGCACGCGAACUGGGGCGUGUCCUGGGAGAUUCAAGUCAAAUAGAUUGACGACACUACUUCGAUUCUAAUCUUCUUAACCUUU
sq24	0.19	0.2	100	47	51/0	AUCCUUCAUUACCUGAUACCUACGCAUCCAAGGCGACCGCCGAUGCCACAACAGCAGGUAAUAACGAACGUAGUUACAUCCCAGAUAUCAUAAUGCCCAA
sq25	0	0	100	50	100/24	GCAAUCAAAUCCUGAACUAGUCUCUAGCACCUCCAGUGAUCACUCGGGGCGGACCUCCUACCUGUUGUGCCCACAAGAUAUGCUAGGACAAAUUACUGUC
sq26	0.3	0.5	100	50	0/0	AAUACCGCAAAUAACCAGUUACCUGUCCCACCUCGCUUAGCGAUCACCGGUAGCAAGGUCUCUUCGAGACACUACCAAUGUGAUCACUAUACGAGGAGGC
sq27	0.3	1	100	47	19/0	AGUACUAAUAAUUCUCCGCCGUACUUCCCUACUCAGCGAACGAGUAAAUUCCCUAACAAAUACGCAUUGUUACAUGCUCUUGGAUGCCAGUAGCCGGCGG
sq28	0	0.5	100	50	74/0	UCUAUAAGCCCUCGCAGUUCGGAGCGACAAUCUGGUCACUUGACCUUCCCACUGCACACCUGUCAAUUCAGUCCCUUCACACUUCUGAUCUGACUCUUAC
sq29	0	0.6	100	49	50/0	UACCCUCCAUCCUUCGGUAGCCGUGGCUAUCUACGCGGCACUAGAAAGAAAGCCCGAAGGUCUAGAGAUUGACCUCGGUUACUUUCAUAACAUUCGUCAU
sq30	0	0.8	100	51	18/0	ACUCCGAAGAAGCCGGCCGUUUCUCUGCGAAAGCCCGCAUAAAUCCCACGAUAACCCGUUAUCCCGCGAAACGCAUAUCUUGGGACAGUACCUAUAUAAC
sq31	0	0.43	100	52	25/0	UACACAUCCUGGGUCGUCAGCAAUGUUAAACCGCCCUACCCUCAAGGCUGCGACAACACCUCACCCAGAGAUGACUAUAAACCCACAGGUUGUGCUUGUG
sq32	0	0.1	100	50	95/0	UAUUCUAUGCGAAAUACAUAAAUACCUAAGAUGGCGCACUCCAUCCACACCACGAGACGCUAUCACCAUCAGCUCCCGUGAACCCUUCCCGCGGUAAUGG
sq33	0	0	100	50	100/52	CCGCCCUUUCAGACAUGUAGACGAGAUCGGAAGAUCAAAGUCAACAUGGCUGAAAGAGGCUAAUCCUCUGUUGUCCCCUCGAUCUCCGCGAAAGCGAUUA
sq34	1	1.96	100	45	0/0	AGAUAAACCGCCGAGAGCACGGAUGAGUGAGCUAUCCAGAAUAUUAGCUAAUAGAAAUCACCGGGCCAAAUGUUUAGUCUAAGCAAACCCAAACCACCCU
sq35	0	0.3	100	48	34/0	ACCACGCAAUGUCCGAGAUAAAGACUGUUCUCAUAUAUUGCACUACGCACAACAGCCGGCAUGUCCGAUUUAAACUCGGAACCGAUCGAGAACGGCUAAC
sq36	0	0	100	50	100/14	AUAUCAAACUCAAAGACAGAGCGCCAGAUCAGAUGAUCUCACACCAGGCCGCUCUGUCGCAUAAGCAAGAGUAGCCUCAUGGCCUUGCAAGACUAAACCC
sq37	0.1	0.2	100	44	38/0	CAGUGUUACCAUGCAACUCAAUGUAACGAUACCACCAACGCCACUGCCAAAAGAUUUAGCACGCGAUAUAUCACUCAGGAACACUGCAUCAGUGAUAACU
sq38	0	0.14	100	50	71/0	UACCAAGCUCCAUACACUCUCCACAUCACCUGGAUGUGGAGUGCCAGCGCAAGCCGCAUCAACAAUCCUCAGGCCAAAGCACAUUAAAUGUGUAUGUUGC
sq39	0.1	0.7	100	46	8/0	CCCGAAUGUACAGAUUUGGUGUCUACCGCGAGCCAACUGGACAUAGACAAUUACUAAACAAAGAGGGCUAGGAAGUACCAGAAGCUCGUCCAAGAUCUAU
sq40	0	0	100	50	99/7	GCUAGUGCUGCGAGCAAGAUUCGUUCAGGCGCGACUGACGUCCUAAUUGCCAAACUCGCUCCACUAAAUAAUUCAAAUUUCCGGCGAACUUACGGACUGC
sq41	0	0	100	50	62/10	UCGAAACUUAGACCUAGCCGUAUAUCUAACGCUGGAUGGGACACGUGGCAAAUAGAACAGCCCGGUCCUACCGUAGUCUGAAGACCAGACUAGUUUGCGU
sq42	0	0.3	100	50	53/0	AACCUCACUCUGACCUAAUGAUGACCUAGGCAACGGAAUACAGCUGCAGUAACUUUGAGCACAAGUCAAGCGCCAUUGACCCAACCGAGCCCACAACUAC
sq43	0.1	0.1	100	50	65/0	CCCUUAACACAGGCCGACCAAAGAGUAAUUACAAUCCUAUUCGCAAGGUCCCUGACAAACCAGCCGCACUUAACUGGAUGACGACGCUGGAGCGUAGUAU
sq44	0.6	1.1	100	50	15/0	UAGUAUCGCCCUAAUUAGAUACAUGCCUGAACCAAUCUUGUAGCACCCAACCCUGCCUCCCUAGGCCAGCUCGAUCGGCUUAGGUGAAAUUUACCACGUC
sq45	0	1.2	100	50	40/0	CCUCCUCUGCACGCCAUAAGACACUGCUUGAUCGCUUUGUCCACCCACGCGAGCAGAGGUUAAGUUCAAGAAACGGUUAUAAAGAAGGUCCCGCAUACAA
sq46	0.61	0.9	100	50	0/0	GACUUCGGAAACCCAUGCCACCAAACAAUUCCUUGAGGGCCCUAGGAAGACAUUUCGUCUUCCUCUAGUCCCUACUCGUCAUCAUUGACUAGCCUUCCAG
sq47	0	1.2	100	49	32/0	AUCUGAAACCUAGGGCGGCUUAGCCCACUACGUUCCGACGACUCAGCCCGAUCGGAACCAUUAAAUCAUUCAGGGGCGAUUUCGCAACUGAAGAAUAUUU
sq48	0	0	100	50	100/24	ACGAAUCCAAUGGACGGCUUGCCAUCUUUGCUUAUGCACUCCCUAAAUGGAACUGAACGCACUUCAGCGAUCAGUGCCUCCAUCACUACAAGGAAAGCGG
sq49	0.1	0.4	100	50	0/0	UUCAUGCUUGCCUCAGGGAUACUGAGGAUUGCUUGAUUCUCUUCAGGAGCAUCACAAUUCCGAUCCUCCGAUGCACCUGACAGACAAUCCCGUCACCGAU
sq50	0.7	0.8	100	48	40/0	AGCUCUCUUGAGCAGCUCCAAGGUAUCACUGCCCGACGUUCUAACCCUGAAAGAUCACCAACAGAUCAACGCAGAACCGAACGUUCGUAUUCUUAAUCCA
sq51	0.7	0.77	100	53	4/0	CGGGCCCACGGAUGACAAUAGGAGGCGCAUCUAUUUGCCCACCUCGCUAGCACACCGUUUCCUUAUCCAAGCUCUUUAACCUCGCUACGCAUCAGCAAAU
sq52	0.1	0.5	100	50	20/0	CCUCGCUGAUCUAAGAGCGGGUAGCGCCUCAGAUCGCACUCUGUAUAAGACUCAGACGAGAUUUCGUUCGAUAUACUGAGAACUGUAGACGCGAACAGUC
sq53	0	0	100	50	100/20	GCCUGGACGCUCUCUCCCACUAUUUGUCUUUCAAAUACCCUAAGCUGUGCUUCUGAGGUCCUGCCCAUAGAAGGCAUAUUACACCGCCUUCUACAGGCUU
sq54	0.81	0.95	100	50	0/0	CCUAACGUGCGGUUCGCCUAUUUGGGUUCGUAUCCAUGCCUAUUCUAAUUCCACACCGAAGAGUCACCUACAAGAGUUAGAACCCUGGCCCGUAAACUCC
sq55	0.3	0.3	100	51	25/0	GGCGUAUCAGACCGCCUUCAAUCAUCUACACGCAACCAGGUCCCUAAUGGAACUGUGCCUUGUGGCUUCCGAUUGAAGACAGGGACAUGAACUGAUAAGC
sq56	0	0.8	100	50	7/0	AGGCUACCCGAUGCGGAUAACCUCUUCCCACGUUCAGUGUUCGUUAUAUACGGCAUAGUCCAGAGGCUACUGAGGACAAUGGAACCGCAUAGUAGAUAGC
sq57	0	0.1	100	50	100/0	AACGUCCAUCGAAUCCAAAUGAGUGAAAUCACGUCAAAGAUUGCACACUCCACGCAGAGCGGAGCGAAGCACCAUCUGCCAACGGAGCAGCAAUCAUCUA
sq58	0	0.3	100	49	36/0	CUGAAUGCGAUAAAUUCUUAUAGUAGGGCAGUCUCGACUUCGGACUCAGCAGCCCAUGUACUAAGGACGCUACCAAUGAAUUUCCGAGCCACGGCUACGU
sq59	0	0.6	100	50	14/0	ACACAUCCAAUUUUAGCUACAUCACCAUCCGAUGCGCUAGAUCGGGACACAUAUAAUCCUCUGGACGGCAAAUUGGUAACCCUCGGGCCAACCACAGCCU
sq60	0.62	1.7	100	48	5/0	CACAAUAUGCAAACAAGCGGCUGGCAGACCCUGAGAAAGGCAAACCUAUAAGAUAUGGUAUGGACCGCUCACUUCCAUCGUCGUCCAUAACGCAACCUUA
sq61	0.5	1.1	100	50	26/0	CCAAUAAUCUCGGUUUCGAUUGGGACCCUAGCACACCCUAAAUCAGCUAGAGGGCUGGCCAAGCUAACCAAUGGCAUAGCCAAGCUUGAACAGAUACCCA
sq62	0.2	0.4	100	48	30/0	GGGAAGGAUUAACUGCGCGUUGAGCGUACGUCCAAACAGGAAACCCUCUUAACGACGAUAAUAACAACUACGCAAAUAGAACUCCUGACUCCCGCUAACC
sq63	0	0.2	100	50	100/0	GCUCCAACCACCGGCAAAUACGCCUUUCACCUUACCUUGUGACGCUACCUGCACUGAGCAGGCAGCCAUAAACCCGGAGCAUAAAUAAGAAGAUAGUUCA
sq64	0.19	1	100	49	48/0	ACCGCUUUCUGGAACAUAUUAACCAUACACACCGCACCCUCAAGGCGCUCGAGUGGUACUAAUUACGAAACCCUCGUUUGAAUGGCGUUUCCCUUUCAGC
sq65	0	0.04	100	48	41/0	GCGCCACCAUACGUACCAGAAUGAUGUUACGAGGUAAGUCUCGAGCCUUAUUAAUCGAGGUGGAGCGCUCACCAUUCGCUCGUUCUCAAUAUGGUGAAUA
sq66	0	0	100	57	76/3	GCGCGCGUUCCACCUAGCGAAAGGCUCUCGCGCGCUGGAGUGGCAACGUCAAUUGGAACAAGGGACGUCAAUGGACGGCUAUCUAGUGAAUACGCCAAGA
sq67	1.04	1.6	100	51	3/0	AGCACUCGAGUGAGGGCUGGUGAAUAAACUUAUGAGUUGCCGCUACUAUCCAGUGCUACCACCCACCCAACUAUGUAGAUAGGAGUACGGGAGACACCAG
sq68	0.2	0.6	100	66	30/0	CGCGUGCUUCGCGAGGCCUGUCGCGUCCCUCGUCGACUCGGCGCUCAGACCCCGAAUGUCCCAAUGACGCGCGGAGGGCACAUGUAUAGAGACGCACAGG
sq69	0.3	1.3	100	52	2/0	AUGGGUUUCUCUUAUCAUCUUGCGGAUCCAAGACUGACCGCAAUCGAACUCGGAGUCUCGCCGGAGUAGCUAUUAGGGUCCUCUCCAGGGUCGUCAUCUA
sq70	0	0.3	100	50	100/0	AUCUGAGCAGCAUACCGCGACAAAGCAAUUAGCUUCAUGGAGAGAAGCGUGUGCAUGCUCCGAAUGUAGAGCCCACCAACCUCAGAAUCACGCUAAGCAA
sq71	0.6	0.9	100	51	2/0	GGUAGUAUGCGCUCAGGCAACCAGGCCACGAGGCAUACAAAUAGAAAGCCAGGCACCCAUUCACCCGCAAGGGAAAUAAUUGGUCACUGAAUCUGUGACA
sq72	0.13	0.23	100	50	41/0	GACCGGGCCGAAAGCAGAAUUACUCGGAACCACAAUGGGUUUCUCCCAACAAAUAAACCAAGUUGCACUGCAGGCUCGGUCAACCCAUCUCACAGAUAUC
sq73	0	0.2	100	50	82/0	GUACCCUCUAGGUCAAGCCAUCGGGAGAUGUGCGCAUUCCUAGAGCUGGUACGCAGGUGCUGCUAUAGAUAAAUUCACUUGGAACAUUACACUGUCCUCC
sq74	0.6	1	100	52	0/0	CGGGAAAUGAGCAAUCAUAGUUCUACGUGGCUAGGCCUCGAGCCCUAUGAUCUCUGCCCGGACAUCGCGAUGUCGCGUCAAGACAGCUAUAUACUUGCAA
sq75	0.1	0.3	100	51	4/0	CCAUCCACUUGGCUUCGAAUUCGUAUACACAAACCAAGUCGAAAGCCCAUGUGCCGGACCUAGGUGAUUCCUAGGCCAUGCUACCAACUUCAUGGGUGCU
sq76	0.7	2	100	50	6/0	AAUCAAGGGAGUAUCGAAGGACCCUGGUAUGGGACCAAGAAUCAACGUGCUUGACUCACGAUAGGUCCUACCGACUGCUUCGGAGUGAUAAUGGGUGAUC
sq77	0.56	0.6	100	50	15/0	UACCCGCUGCAAUACUUUCCCAUCGAUAGGGCCUAAGAAAGCAAACACAUUUCGGAGCGUAGGCAUCACUACAAAGUCAGGCCCUUUACUGCGCUUCCCA
sq78	0	0.3	100	46	48/0	AUAAGUCUAUAAUGCAUGUCGUAUGGGAUAAUGCGACCUGGCUUGAUCAAUUAGCGGCAAUUUGCUGAAGAAUUAACCAAUGGCGCCUAGGCUCGCGGAG
sq79	0.2	0.4	100	49	6/0	CUCGUGAGCGAACACAUUCCCUACGCGCGGAAUCAAUCGUAGCCCUUGGCCUGCUGACACAUUCCUUGGGUAUACGUGGUUCAUUCUGAGUGUUAAAUUA
sq80	0	0.1	100	52	85/0	AAACAAGUCCGAGGCAGAUGUCGGUUAAUCUACCAGAGGACACGAGUAUAUCGCCUAUCCCACGAUCUAAGGCGGACUCUAACGCCGAUAGGGAUACGGC
sq81	0	1.6	100	49	15/0	CGAAGGACAUCGGUGAUGGUACAACUUUAACUUCACUUAAAUCCGGCGAAACCAGGGCACGGAGAGACAAUCGCCUAAACCUUUGUCCCCAACAGGGUAU
sq82	0	0.1	100	50	93/0	CGAGUCACUCGCUAGUACGCCAAGCAUCGUCUCUUCACUAGAGACAGCUCUUUCCUCUGAGCAAACCACAAUAUCUUUGGCUUGAUAGCGUACUAGCGCC
sq83	0.3	0.5	100	49	38/0	UAUAGCUUGCAGUCUACCCAGACCGGGCACGAGAGCAUCCGGUUCUCUAAUCAGUCCUUUAAUGGUAUAAAGCUACAACUCACACUUAGGCUUGCGCCAC
sq84	0.3	0.4	100	51	35/0	CCUGACACUGAGAUGAUUACCAUUUCCACUUCGGCCAAUUGACUAGUCUGGGAGCCAAUCGCACACUAGUCAGCCAGAGGUCAUCUUCCUCCAGGUCAGA
sq85	0	0	100	50	100/25	AGGGCCUGCCUUUCUUAUACCAUCCAUACAGGAGUUCAUGGCAAGAACCUCUGCAGGUCCAACACAGCGCUAGGCGCCCUUAGAUUCAUUCUAAACUAGC
sq86	0	0.8	100	50	18/0	CAGUGUAACAACUUGUACGAACCGCCCGAACCUCCCAAAGUUAACUUACCACUCCAUUAUCUUUACGGGGCAGACGGGAGUCAAGUCGUUCACCAUCCUG
sq87	0	0.5	100	50	49/0	UCAGUCGUGCAAGACCGGAAGGGAAAGGCACAUGAAAUAAGGCACAUGCAAACGGUGAACCUCAUGAGACUCCAUAGAGCUGAUGUAGGAACCGUUGUCG
sq88	0	0.1	100	50	90/0	UGCCAAGUACUAGCAGUAUACGCAGGCUCUCAGUCAUAUAGACAACUGCCGCCACCUACUACUCGUACACCAAGCUCGGCCCGAUAAAGGAUAUGCACUA
sq89	0	0	100	50	100/16	CCCAUAUCGAAUAAUAAAUUCAAACACAGCCCUGCGCGGAGUAUGCGCUCGUGACCACACAGGAGGCAUCCGCAGCUUGGCUGUCAAUGUCUAUUUACCU
sq90	0	0.01	100	50	100/0	ACGGGAGCACAUGAUAGCCGGAAACGUGCAUCUUAGCUCCAGCCUCCCAUCAUACAAUAGCUAUAGGGUCCGCAAAUAACUACCCAAGCGGACACCUAAA
sq91	0	0.1	100	50	86/0	UAAUCCGUGUAGAGUCAGACACUCCAGUCUGAAACAGAACUGAGCGACAUGAGGAUGUUAGAUGUGCGCACAUUCUGCCCUCACGCUGGUUGUGAAACCC
sq92	0.7	0.7	100	50	8/0	CCAUGGCACGACAUCCUUCGGCUGCCGUGUUAAUAAAUAGAAGUGAAGCCCACAGGGCACGAGAUUGCAUGGAGAAAGUUGACAUCAAACGACACGUCUC
sq93	0	0.1	100	50	77/0	GAACAACCAUAAGAACCAAUCAGUAUGCGUAGUAAGGCUCUAGUCGGGCGCAAAGGGUGCUUAUUAUAAGCAGAGGGCGCAACGGCCUAGGUCAGACUAG
sq94	0	0.5	100	52	20/0	CGGCGUCUUUCAGGUUGCAACGCUGCGUCGCCUCAGUACGAGGCCAGCUGCCCUGAUUUAUGCUGUCGAGUAAUGAGCUCUAGCAGUCAGAUAUAUUCUA
sq95	0.88	1.12	100	55	0/0	CAGGGACGGUGAAUGUAGGCCGACCAUUCCUUAAACACUUUCCUACACCGAACCCGUACUUCGGCGACUCGGGCUAACUUUACCAUUACGAGUCCCGCGG
sq96	0	0.7	100	50	23/0	CCGGACCUACGACCGCUUCCCAACGUUACCUUGGUUCCGUUACUCCCUGAUACAAGAUAUUAUACAUUAAUAUCCGCGCCCGCUGCCGAUGGCAUCUAAA
sq97	0	0.24	100	57	43/0	CUAUGGUCCCUCCACUCCGCGACUGGCCAGACGUAAUCCACGAGCGGAAACAGCCGCACCAUUCUAUACGGCGGCCGUCAACACUCAUGGACUAUAGUUG
sq98	0.3	0.3	100	50	0/0	AAGAGAAGUGCGUCCCUCCAGCGAAGGCCGAGGUAGACACACUUCAACAUUUAUUAAGACGCCAACUCUUCAGAACCUCGAAAGACAGCAGCGUCCCUUA
sq99	0.59	0.8	100	53	0/0	UCGCGCAGAGCAACCUCCCAAUCCAGCACUGUCUACCCGUCGACUAGCGAAUAUAGAAUGUGCACUGCGCGAACUAUACAAACUACCUCACGGCACGCAU
sq100	0.2	0.6	100	50	23/0	UCUUACAGAGCCACUCCUCUUCAAGAGUAAUACGUCAUGAGUACAAGGGCAGCUCUCUACUGUGUUCAGUCGAGAGUGAUAACCCGUGGGUCAUCCCGUC
mean	0.2352	0.5904	-	-	-	-
median	0	0.4	-	-	-	-

## Sheet: Table S9
Additional file 1:Table S9 The detailed results of four-target designs with sequence constraints (RNAdesign dataset [4str]).
target	de1	de2	Nsq	GC	n1/n2	selected sequence
sq1	0	0.1	100	50	90/0	UAUGCCCUAAGCUCUAUCACAAUUUGAUCUAACGACUAGUUACGGAGGUAUGGAUGGAGUAGCUAGACGCUAGUCCCUCCCGCCUCCUCUAGCGUUAGCG
sq2	0.7	4	100	54	0/0	CACGAAGCGGCGUCCGUCGCAUGGUUAGAAAUAUCACUUAGUAAAGAUCGAUGUUCGAGCGGGCCCUUACUCCGAUGGACCGGCUGGAAAGAGGUCCUCA
sq3	1.3	1.7	100	45	1/0	AAUGCCAUAUGUACAGUUCAAGCCAACUACUCACUCGUGUAUACGGACUCUACCAUGGUUGCAAGCCGAACACACUCAAGUCUACUAAAUAACGGCGAAC
sq4	0	0.3	100	51	38/0	UUCCUUCUUAGAAGGCCAAAGACAGGUGUUCCCAAGAGUUCCAUAACACGGAGCUCCAUACACCCAUCAGCCGCGACAGUAGGAUGACGCAUAUCAGACC
sq5	0	0.6	100	51	79/0	CGUUUCACGAAUUCUGGACCUCUAGAGCUCGGCAGAUCGCGUAUCUCCGAUACAGAUCUCGCCCGCUCUAGAGAGGUUACUGGUGUAACCAAUUGCUAUC
sq6	0	0.6	100	45	29/0	CAGUAACCUACUGCCGACAACAAUGAUUAACAACCCAAGUGACACCUUUGCCUUCGUGGCUAAGCCUUGUAUAAUACUCUGGCACUAUUAGUCUAACGGC
sq7	0.4	0.5	100	53	18/0	UCUCAACCCGUGUCCACCGUAGGUCACGAUUCCGUAACCAGGACCAAUCCAAUCGUCCGCUUAGCAUGUAAUAUCAUGCCCGGAAACGGCUACGGGCUAU
sq8	0.3	1.4	100	48	0/0	CCUCAUGCUUUGAUCCCAGCCACAUUAACAUCCGAUAAUACGUAGCGCGCUACUAUCCAAUCUGAUGCGCGAUCCGGAAAGGAUUAACCUGGCGAACUUU
sq9	1	1.38	100	50	38/0	AUCAUGAUCACCCGUUAUGCUCGCUCCAUGGAGCCACUACUCGCUACUGCAAGCUGUAGUGAGCGCCAAUAGCAUCACAUACGGGUUUUGUACAAACGUG
sq10	1.3	1.61	100	51	0/0	AUCUUUCUACUACUAUGUAAGCCCAACGGCCCGGCUGGUCCUUCAAAAUAGGCCCAGCCGCUCCGGUGGGAGAACGUUACGUAACAUUAUAACAGUCGUG
sq11	0.2	1.2	100	52	35/0	CAAUAGAGUCUAUAUUUCCCUUCGAUUCCGACAGCGCCUUCCACGUCUCGGUCUCGUGGAUAGGAACUCUCGGUUCGUGUCCUUGGAGGUAAUCUCCUCC
sq12	0.4	1.6	100	49	46/0	CGACAGCUGGAACUUCCAAGAAGCUUGUGAACAACCAGCUGAUGCUGCUAGAUGCGUAUGGCUCCUAUGCAGUCCCAAACAUAUGCUGAGCAGUGUCUUU
sq13	1.89	2.49	100	47	3/0	ACACCCUGAGAAAGAUAACAUCAAGGUGGGAUAGGUCCCACAGGACUUCUUCAUCACAUGUCCUCUGUCUUGCCUUGAAAUCUCAAGGAUGGGUCCAGAA
sq14	0	3.6	100	50	11/0	ACAACGGCAUCAAGGAGUAAGCCAUUGAGUACGGGUAUGACAAACCAUGGCGACAUGUAAGGUUGCGACGGCCAUGCAUCAAGGCAAACAGAACCAAUGC
sq15	2.4	3.83	100	47	0/0	AACUGGGUCCCGGUCAAUACUAGAGUACGGACUCUUAGCGCAGAACGAGAUAUAACAGCGGACCUCAAUUCACAAGGAAGUACGCAGUAUUUGCCGAAAU
sq16	0.2	0.37	100	51	21/0	UCGCAUAACCCAAUCAAACCCGCACUCUGUCUAGCUAAUUAGCACCCGAUCACGGGGUCCUAAAUUCAAGGCCUCACAAUCCACUGCGAGACGACAGAGA
sq17	1.2	2.5	100	50	12/0	GCUAUAGGAUUCCUCUAGAGUUUCGAAGACAAACAAGAACGGUCUAGUCACGAACAAUCAGGAACGCCCAAGAGCGCACACGUAGCGCUCCUGCUUUGGU
sq18	1.38	1.8	100	53	0/0	CAUACGACCUCCCUGGUAUAAUAAGGUAGCUAUCUCCGUAUUUCAGUCACCGUGUGAGAGCCCUACGGGACGGCCGAGCAACAAGGACCCAACAGUCCUU
sq19	2.3	3.9	100	42	0/0	ACAUUCCGAUGUUCCUUCCAAGUAUGAAGCCAAUUACUAAUUGGCGCUAUUCAUCGUACCGUCGACUUCUUAAGCGAAAUCGAGAAUGGAGUAAGAAGAG
sq20	0	1.8	100	51	5/0	CUGGUCGGAUAACUGGCAAAGAGCUUACUCCUAAGUUCUUAAAGAAGCGUUCACCAGAUCCAUCCAUUAGGCACGGAUCUGCCUCAACCCCAGCUCCUGC
sq21	0	1.5	100	52	35/0	GAGAGCCGGAUUACCACAUUAACCAUACGGCCAGUUCUUAGUACCCGCUGUCUAGGCACCUCGGCGAAUAACACGAAGCCGAUGGAGCGCUUAAAUUGCU
sq22	1.5	3.2	100	50	0/0	UGGGACUCUGCUCCGGGUCACGAGACUAGUAGGAACCUCACCGCGAUCUUUACCGGAUCAAAUGACGGAAAGUUAGCCUGAGUAAUACUCCUGAUAACGU
sq23	0.4	1.7	100	50	13/0	GCACUUGGAGAAUUUCCCGCCAGGCGAUGGUACCUGGCCUCCGGUGGAUCACGUCGUUAUGAAUGACCUAGUAUAAAGGAUUCUAUUCACCACUACUCAG
sq24	0.09	1.3	100	49	6/0	AUAAUGAUCGCUAAGAUACGAACCGGUCUCAGGUUCGCACCGACCGACACCACGCUUAGCGGCAGUAUUCUCCUGUUCUUUCUCCUAUCUGUGAUACCAA
sq25	0	0.6	100	47	1/0	AUCAGUUAAAUAAACACGGGAACGUGGGUUCAGCCUGCAACGACGGACAACGAUAUCGGAGUCUACUCGACGCACUCUCUACUUACUUCACAUAAAGGUC
sq26	0	0.5	100	50	21/0	AAUAACGUCCAAUUCUCGAAUACGACCACCGGUGAGCCACAUUUCCUGUGGUGACCUCUAAUCACGUUAGCCGCCAGAAGGGAAACGUGAGUCACCAGUA
sq27	1.24	1.5	100	50	15/0	UUUCUGUUCGAAACGCGGCUCCAUUCCCUCAUCUAGUAAACGGAUGUCAACACAAUAGCAACUGCGGCUAUUACCGUCUUCGGGUACCGAUGAUGAGCCG
sq28	0.9	1.3	100	52	2/0	UAUCAUUGCCACCUAGGUUUGGAUGCGUCUCGACGGCUCCCGCCGAUCCUACCUAAUAACACCUCAAGCUAUCCCAACGUAUCCUAGCGGGAGGACAAUU
sq29	0	0.4	100	50	49/0	UACCUCACCGCCUCUGGUAGCCCAGUCCUGUAUCUGGGCACUAAGAAGCAUGUCCAGAGGAUAAUGAACGAUUCCUGGUGUCAUGCAACACAUUCGAUCU
sq30	0	1.2	100	54	4/0	UCCACCAGCCGGAGAGAUUCAGGCCUGACCUGUCUGUCAAGAACACGAACCUUGUAACCAAGGAUGACCUGGUCGAAGGCUCGUGCAGUACCUAACCUAG
sq31	0.7	1.63	100	57	1/0	AAUACAAGCGACGUCGUCGGCAACGUUUACCCGCCCUACCCUCGAGGCCGCGACAACACGCUACGUCGGCUUGCAAACUUUCACAUCGCCUGUAGUGAUG
sq32	0.4	0.7	100	47	33/0	AAUUAAAUGAGACCACCAUUAAUUACAAAGUUGGCGGGCACCAACAUCCACCCGUGACGCUAGCAGAAUGAGUUCCCGGGAUUAACACACUCGGAAGUUC
sq33	0	0.3	100	50	86/0	AUCCAUCGCGUACGCUGGGCCCGAUAUCUCCAGAUAGAAGGGGCCAGCAUAUGCGAAUGGUUAUCUAACUAAGCAGAACCUUAAUACGCUCGCGCGAUAA
sq34	4.86	5.8	100	43	0/0	UGCACAACGAUCUCAGACAAGAAUCCACCCAUGAUUCCGAAUAUUCAUGCAUCAGUAGGGUCUCGUACAAUGUUCAACUGGAAUAAACGACCUCAAAUGG
sq35	1.11	2.1	100	45	4/0	CCAUUCUAAGUAUUGUAUGCAACUUCAAGUGCCUUACUUAGUCAUACUACACCGCCCGUCCUAGUCGAGCACAUAUCGAUAACGAUCGCACUUGGGUAAC
sq36	0	0.1	100	50	47/0	CAUUCAGCGUACCCGAGUGUGGCGAAGGUCAAGUGACCUAUACUCAUCGACCACACUCUCCUUAGAUAUACGAGCUACUUAGCAUAUCCCGACCAUCCGA
sq37	0.2	2.8	100	51	1/0	CUGGGGAUACCAUCCUUUCUUGGAUCUGCCGAUAAUACUGAUACAGCCGAACGAAUCCGCUUUCACACCGGCUCUCUGUUUCCCAGUUCCAGAGCUGUCU
sq38	0	1	100	49	37/0	CCAGUUCCAGAUGGAUCUAGGGUCAUGAAACCCAUGACUUUUGCACGAGAAAUCCGCAUCAAACCCACUACAGCCGCCGCGAAUUAAAUGAUCCAUUCGG
sq39	0	0.1	100	50	78/0	UUUGAACACGUGCGUUCGACGAGUAUCAUGGCCCAGUCGAGGAUGCAAAUCAAGCAGAUAAGAGCGGGCAGAAGCCGUCGAAAGGCUAUUUGACUCCUUU
sq40	0	0	100	50	98/17	GCUCUUGGACGAAGAUUGCAACGAGCCGGAUCUGCGGCCGCACAUAAAUCCUACCUUCGGACAAGAAUUCAAAUCACGUGCGAAUACUAACAUCGCUUGC
sq41	0.1	1	100	51	12/0	AGAAGAACGUUUCCGACAUCUCCCAAACAGAGUUGCAGCGUAUGGCUCGUCUUUCCUACCGACCUACGCUCAUGAGAUGCACACCGCAUCUCUUCUCUCU
sq42	0	1.5	100	51	15/0	CACAGCUGUCAUCCCGUAAGAAGCCCACGGAUACGCCUCACAGGACUCGUUAAUCGAUCCAUCGGAUAUUGCUAUAUGUCGCAUGCGCUCCAUUCACCAA
sq43	2.5	3.2	100	50	0/0	AUCCAGCGCAUUGGUGGUCACCGCUAGUCUCUCACUUCUAGCACAAGGCCCAAUUAAACGUAGUCCUGGUUCGCUACUCACGGAUACUACAGUAUACGAC
sq44	0.7	1.4	100	46	6/0	AAACUGACCGCAUCUCCUCAGUAAGUCUGACCUAUUCUAACUGCAAAUACUAAUGCUUCUCUGAGCUAGCACGAAAAGCUUAGACGAUCCCUCCCACACC
sq45	0.3	0.5	100	51	0/0	CAUGGUGCUUAACCCUUCCGCUGCCGCAACCCAGCCUCAGCAAUCCUCGGUCAAGUACCUUUAAUCUUCCCGAUACUCUCUUAGCAUGACGUAGCCUUUA
sq46	1.4	1.47	100	50	12/0	CGAUGAGUCAAUUAAAAGCCACAACCUUCUCCUUGGAGCUCACUGGCGAUCUUAUUGAUCGCCGACAUCGCUCAACCUUGGAAUCCCGAUGUGCUGACAG
sq47	1.2	1.2	100	50	0/0	AGCUGCCUUACAUCUAAAUUUAUAGAGCCACGUGGGCGGCAAUCUCACGCACGCCCACAACCUUCGCAUGCAGAGUCUGGAAAGAAACUGUAGCCUCAAU
sq48	1.3	2.1	100	50	14/0	CUCUAGGCGAUGGACGGUAUACCAUACAAACAAACGUUCUCCGACAAUGGAACUGGCCUUCUACUCAAGUCCAGUGCCUCCAUACGACACAGCUGACGAA
sq49	0	0.2	100	50	47/0	AUCACGCGAACCCUGAAUGAUUUAGGGACAGCAUGAAUCACAGCUUGUCGGAGGAAGAGAGAGAAAGGACUCCGCCAAGUAUGUCGUUCCAGACCUAGAC
sq50	0.7	0.9	100	50	0/0	CUCACAGUAGUGAAGCAAGUUAGAACAUCUUCUCGACGCAGAAACUGGAACGCACCAUACAGCGGUGAAUGUCCUACGCUGCGUUCGUUUAUCCUCCCUG
sq51	5.97	6.8	100	51	0/0	AGGACAUGUGCGAGAUAAUAGGAGGUGUGUUAAUUCGCUCCCCUCGCUAGCGCUGCGCUUCCUCUUGUAGGUCCCAAAUGCAAGCUAUACCCAGGUCAAA
sq52	0.2	0.9	100	51	0/0	AAUAGCGGAGAUAAGAGCGGGGCGCGCCUGAUCUCGCCCUCCGUAAAAUCAUCCGACUGUAGACAGUUAGAUUUACCGAGAUUCGUAUAGGCUAACGGAG
sq53	0	0.2	100	50	64/0	CUAGUCAUAGGUACCCUGCAGCAGGCAUUAGGCCUGCCCACGAAGUUGCUUCCCGCCAUGAACUAUCUCACUAGACUAGACAAACUCUAGUGGUCUAGAA
sq54	3.1	3.9	100	48	4/0	CCUAACAUGUGGUAGGCCUAAUUCGUUGCAUAGCGGUAUAACUACUUUCGCUCAAAUGCGUAGGCUACUAAAGGUGGAGGUAACGUGGUCCGCAGAGAAG
sq55	0.9	1.6	100	53	7/0	GCCAGCCUUCGAGAAGUGCACACAACCAUAUGCGAGUAGGUCCCUAACGGAACUAUGCCUUAUGGCGCGAGUGUGCACGAGCUGAUACUAAGAAGGUAGG
sq56	1.91	2.81	100	48	0/0	UGAAACACCAACUGUGAUCUUCCAUUUAUACGCGUAGUGAUCGUAGUUGACGACACAUCCCGAAGCCUGCUAAGGGACGUGACGCACAGUCUGUUAGCUU
sq57	0	0.4	100	50	46/0	ACCGAACAUCGAGCCAUCAUGAGUGUUAUCACGUCACAGGUAUCCACUCGUCCAUUCCACGCGUCCAUGAGGCAGGAAUACACACGAACGAUACCAUCUA
sq58	0	1.7	100	51	9/0	UAGACUGCCAAAUAGAGCAUCGACUUGCUUAGCGAGAAUCCUGCUACCAAGGGCAAUUAGUCGUGCUGGCCUGCUUUCUCUAUACCCGCAAUAGCGAGGC
sq59	0.5	1.1	100	50	0/0	AUAAUUCCUACUUUACCAGCUACUACAAGUGUAGAGGUAAACCCGGACUAACACAACCCGAAGGGCGGCAGAAAGGUUUCCCAAUGGCCCACCUACGCCA
sq60	2.3	3.1	100	50	0/0	GACAACAUGCACCCUAGCUGCGGGAUCCGAGAUAGAAACGCUGGCCAAAUUCUAAAGGCGAUGACGGCUAUGAACCUUUGCAGUCAUUGAAGCAAACCAC
sq61	0.2	2.3	100	47	9/0	AUUUGAAAUGUAAGAUUACUUGCGUGCCUAGGGAUCAUUCGGCAACCUAGAGCGAGGUCGAAGAGACUCUUGACCUUUGGUCCUCUUCUCCCUAAACGCA
sq62	2	2.4	100	46	14/0	UCAGAGGCCUAAUAUUGCGUGACGCAAUUGGCCCACUAGGCAAACCUUGUUACGCCAAAUUCUAUCACUACAAUUAUAGCCCGCCUAUCCUGAAGGAAUC
sq63	0.1	0.8	100	52	15/0	GCGUUAACGAACGCCCGCAGAGGCUACGAAUAUACAGUUUCGACUCCGAGCGAAGACCGUUCCGAGGGAACCAGAAGCGCUAAGACAACGAGAUAUUUCA
sq64	0.1	1.39	100	45	7/0	GUCUUUCUACAGUACCACCAACCUGAAAUACACGGAUCAUUUAGAGCCACGAAAGGCAUAGAGCACGAAGUCUUCGUUUAGUCAGCACUUCCUUACUGUC
sq65	0.16	0.4	100	47	1/0	GCGCCGCUGUACAUAAUGGGACGGUGUUCUAAGGCUAAUCUUAAACUUUGUCGACUGAAGUGGGGCAUUCGCUGUUUGCCUGUCUUUCCUAUAGUGAUUG
sq66	0.3	1.1	100	48	0/0	GUACGUCUACUUCUAUGUAACUAGUGACGACGUACAUAUGAAGUUGGACCAGCGGGAACCGGAGGUCUCAGGAGAGGGCUAUCUCGUGGAAAUACUUAGA
sq67	0	0.5	100	56	21/0	GGCGCUGGAACUAGGGCCGGUUAAUAAGCUAACAGGCUACCGCUGUUACGAAGCGUCGAAACCCACCCACAUGCUCGAGCAUCAGCACGGGAAAGACCUA
sq68	0.2	1.7	100	60	1/0	GUAGUUUACCUACGGGCACGUCUCGUCCUACGCAGACACUGCGCCGACACCCAGACCGUGAUUCUCGCGCGCUGUGGACACGCGAAAUAUGGCGAACGUG
sq69	4.1	4.9	100	43	0/0	AGCUUUACUAUCAAAGUUAUGCAUUAGAGUGGUUAUGAAUGCAGUCGCAAGGGAGUAAUAUUGAGGUCACCGCUGAGGUCUUCUUCAUUUCGAACAGGGC
sq70	0	0.3	100	50	100/0	CGAACUGCUGCAGGCAGAACAAAGUCACCCAACUUCAUGACUAGAAGUGCCUGCUAGCAGAUCUUGCCCUGCACACCUUACAGUUCAUAUCGCAACGCAU
sq71	1.4	1.6	100	50	9/0	GGUAGCUUAGAGGCCGUCCCUUAUGACUAGCCCUGAGCAGAUAUUCGGCGAAGCACCCUAUGAGGCCAAGGCCAAUAAUAAGGUCAUUCAAGAUGUGACA
sq72	0.1	0.6	100	50	7/0	CGUCGUGGCCUCUAGCUAACCGAACGACAUUAUAACAGGUGUCACCUGGACCAACGAUCAUUCCAUGAGUUUGCCGCGACGUAAAUUCUGUACCAGGUGA
sq73	0	0.9	100	50	51/0	GGUCCGUUACACCAAUGCUAUCCUAAGAUACGCUAAAUGUGUAACAAGGGCCGCGGAAGCCGCUAUAGAAUAACUCGAUUGGGACGACUUACUGCCCUCC
sq74	0.6	1.7	100	57	0/0	GGUGGAACGGCAAGCUGUGCAAGGCGAGAUCUCCGAUGUCCCAGGCACAGCGCCAACACCGGAUUAUGGAAUCCCAUCCCUGGAAGCGAAGAAUAGGCAU
sq75	0	3.1	100	50	100/0	CCUACCAGUAGUAUCCUACCCAUCUACAUUCCGACUACUAGUGAUACCAUCUGCCCGACAAAUCCACCAGAUUUGCGACGCCUCCAACUUGAUGGUAGCC
sq76	0.3	1.8	100	50	1/0	GUUUAGAGGAGUUUCGAAGGGCCGUGGCGUCGGGCCGGUUGAAUACGUUAUGUUGAAAUGAGAGGCCUUGGCGAUAAUUUCGCGAUGAGAAGGGAUAAAG
sq77	0.8	2.24	100	50	3/0	CAACCGCGAGCAGGACUUUCAAACAACAUGACUUAGUAGCGCACACUAGGCUAAUUGCAGCGACCCAACGCUUACGUAAAGUCAUACCCGCUGCAAUCUC
sq78	0	1.2	100	52	23/0	UAGAUCCUAGAACGCCAGUAGCGUGAGGAAACGUUGCCUUGCUUCCAGCCACGUUGUCGAUAUGAUGUUAGUGGGACGAAACGCGCGUAGGAUAACGGGA
sq79	0.9	1.3	100	53	6/0	CGCGAGGGCGUACUCAUCCCUAGUACCUGGGAUAUACUGUAGCUCGCGGUCUGCUGGAUCAUCCCUGGAGCUUACAUGGUACAUCCCGUGUACAAAUUUG
sq80	0	0.2	100	50	55/0	UCAACAGGGCGACAUAGUGAUGCAGCCUAUUCUGAUAGCCCAACCAUCUAGGCCGCCCAUAGUGAAUCUAUGCACACUGCCUUGCAAUUAUAUGGGUCGG
sq81	2.3	3.65	100	42	12/0	UAUUGACUAAAGAUUUGGAUACACAAAGUUAUAAGAAAUUUUCGGGACCGCCUACAUCUCCGAUCGAUACAAAUCACCAUCGGUAGUCCCAACAGGGCCA
sq82	0.1	0.8	100	49	0/0	CUGGGACCCAGCAUGUUUUCGCUGUUAGCCCUGCUUGGCGCAGGGAGUAUAGAAAUUCAUACAUCAUAAACUCAAAGUUGCGGUCCGGAGAGCGUGUUUA
sq83	0.2	0.4	100	49	0/0	AAGGCUCUGAAAGGCUCGAGCCUCUGUCGACUGAGUCGAAUAUUCAGAAUUAAGACGUCACCACGAGAAGGAGCCAAGCUACACCAAACCCUUAAGGGAA
sq84	0.1	0.6	100	50	15/0	AAUCUCUGCUUGGCAACCUCUGCUAAUAUUACGCUACAAUUGCGUUUCUGAGGAACGACCACACAAGCGCAAAGCCGUGAUUGCCGCUCACAGUGAGGUC
sq85	0.8	1.7	100	48	11/0	CGACCAGGGCCAAACCAAACUAGGGCGUGACCCGAAAUUAGAGGUUUCUACUCCUUGGUCAUUUCAGAGGAUGCUUCAGUUAGGAUCACCCUAAACAUUC
sq86	0.9	1	100	50	4/0	UCAAGCGCUAUACGCCGCGCAACACUCGAAACUCUCACGUUAUAACGACAACUCCAUAUCACGUCAGGAGCAGCCGAGAGCGCGUACAGUCUUUAUUUAG
sq87	0.19	0.7	100	50	2/0	UCAAUAUCUACAAAUCCCAAGAACCAAUAGAAUGAACAAAGGCCACAGCGCUCGUCAAGCUAGCCUCGACUCGCACGAGCGUGGCAUAGAGACGAGGUCA
sq88	0	1.7	100	50	20/0	UACUAAGAAGAUCACUGUUACGCACCUAUAAAUGGAUUACCCAGCACAGGGCACCCACGGAGAACUUCAGAACACAAUCACCUGACCCGGCACCGUACGU
sq89	0	0.2	100	50	39/0	CCUACCAAAGCCACAAGGGCUAAUCUGAGCCUACUGCUCAAAUGGAAGGAAGAAUGUAAUCGUCCUCUUGAGCAAGCCGGCUCAUUGUACAUCCCUUCCC
sq90	0	0.29	100	50	36/0	CAAGUGGAACCACAUAGCCGACUACGUGCAUGAACUCCACGGACCACUAACACCUUACAUCCUGUUACUCGUGACAGCACACAUUCACGCGAGUUAACCA
sq91	0	0.4	100	50	61/0	AAGUCCUACCAACGUCGAGCACAACAGCUCGAAACAUAGUCAGUACAUGUACGGAUGCUAAACAUCGUGGUGUUAUGCCCGUGGUGCGGCUUUGAAGCCU
sq92	1.8	2.7	100	49	0/0	CACCAGAUCGAGCACUGUCGGCGUCUGGUCAUAACACUUGAAAUGAAGCUUUCCGAGCAGAACAUCAUGGUGAGAAAGUUGAGCCUGAACAGCAUGUCUC
sq93	1.8	2.2	100	58	8/0	CGUCCCAGAUAUGCCUGCUGUUCUAUCCUGCGAACGUUAGACGACGAGUCUCGCCGAUGCGCCCUUGGCGCAGUAAAGACAACGUCCGUCGACAGUCGUC
sq94	0.1	0.7	100	50	10/0	CUAGAACGCGCCUAGAAGGAAGUCGCAACGCCCGAUACACGGGCCGACCCUUGGGCAAUUUCUAGCAGAAGAAAUACUUCCUAGACUAUGAUCUCUUCAA
sq95	0.81	1.71	100	50	1/0	CGGGCACGGUAAACAUAGACCGAACGCAACACUCUUUAACCUCUAUACCGAAGCCGCAGUUUGGACACUCGGGCUAAAUUUACCUAAACGAGUGCCGUAC
sq96	0.7	2.2	100	52	12/0	UCGUUAACAUGAGAGCAACUCGAGCGAAGAUACCUGAGUUCCCAUAACAAGAUUACAGGCGGGCCCACCGCCUGAGCUAGCAAUUGCGCCGCAGAACAAU
sq97	0.12	1.04	100	48	14/0	UCAGAUGCGAACUCAGGACGCCGUGUAAACUGUUGAAGCGACCCGUCCACGUUGACGAUACAAACCCAACCGUUGCUGGAAAUAAUAACGUAUCUGAUUG
sq98	0.1	0.5	100	49	43/0	CAACCUAAGCCGUAGGCGGAGUACACGCAUGCUAGUGCUGCUUAGACCCAAACUUUAUUAUCAAACGCGUCCGCACCGCAUACGCAACCAGAUAAAUUGA
sq99	0.09	0.2	100	50	39/0	GCUAGCGGUCAAAUGACAUAACCCUCGACCCAGAUACCCUACUGCACGUACCAAUCUAAGUUGUCUGCUAGCCUAAUUCAAAUUCCGUCCGCGUCUCUCC
sq100	1.4	4.4	100	54	0/0	UUCUUCAGAGUCCUAUCUCUUCAGGAGCGACGUGUCAUGAAUGCCAGGGAAUGCAGCAGGUCUCGGGACCAGUUGCGCAAAGCCCAGGAGUCAUCCUAUG
mean	0.7222	1.5651	-	-	-	-
median	0.2	1.34	-	-	-	-
